# Supplementary material
Source: publisher figshare collection journal article supplement (https://acs.figshare.com/ndownloader/files/13125284)
Supplement: Supplementary file 1 [file 13125284]

## **Supporting Information File 1: Polymer Identification of Plastic Debris Ingested by Pelagic-phase Sea Turtles in the Central Pacific**

Melissa R. Jung, George H. Balazs, Thierry M. Work, T. Todd Jones, Sara V. Orski, Viviana Rodriguez C., Kathryn L. Beers, Kayla C. Brignac, K. David Hyrenbach, Brenda A. Jensen, and Jennifer M. Lynch

### **Table of Contents**

|                                                                               |              |
|-------------------------------------------------------------------------------|--------------|
| Hook Depth Protocol.....                                                      | page S2-S4   |
| Table S1. Sag ratios and catenary angles for hook depth.....                  | page S5      |
| Table S2. Summary statistics of the mass of ingested polymers.....            | page S6      |
| Table S3. Summary statistics of the composition of ingested polymers.....     | page S7      |
| Table S4. Estimated catenary hook depths of individual turtles.....           | page S8      |
| Figure S1. Sorted ingested plastic debris.....                                | page S9      |
| Figure S2. Hook depths corrected for shoaling.....                            | page S10     |
| Figure S3. Histogram of hook depths corrected for shoaling.....               | page S11     |
| Figure S4. Percent ingested mass of polymers versus hook depth.....           | page S12-S17 |
| Figure S5. Percent composition of polymers in olive ridleys by sex.....       | page S17     |
| Figure S6. Percent composition of polymers in olive ridleys by age class..... | page S18     |
| Figure S7. Percent composition of polymers in olive ridleys by year.....      | page S19     |
| Figure S8. Olive ridley % ingested mass of polymers versus SCL.....           | page S20-S24 |
| Figure S9. Green % ingested mass of polymers versus SCL.....                  | page S25-S28 |
| Figure S10. Olive ridley % ingested mass of polymers versus latitude.....     | page S29-S34 |
| Figure S11. Olive ridley % ingested mass of polymers versus longitude.....    | page S34-S39 |
| Figure S12. Green % ingested mass of polymers versus latitude.....            | page S39-S42 |
| Figure S13. Green % ingested mass of polymers versus longitude.....           | page S43-S46 |
| References.....                                                               | page S47     |

See **Supporting Information File 2** for a spreadsheet containing the ATR FT-IR spectral data for all analyzed ingested debris pieces.

### **Disclaimer**

This is an official contribution of the National Institute of Standards and Technology, and is not subject to copyright in the United States. Certain commercial equipment, instruments, or materials are identified in this paper in order to specify the experimental procedure adequately. Such identification is not intended to imply recommendation or endorsement by the National Institute of Standards and Technology, nor is it intended to imply that the materials or equipment identified are necessarily the best available for the purpose.

## Hook Depths Protocol from Bigelow et al. <sup>1</sup>

1. Obtain NOAA observer report for individual turtle
2. Enter the following information from the observer reports into separate columns in a spreadsheet:
  - Vessel Documentation No.
  - Trip No.
  - Set No.
  - Hook Type
  - Target Species
  - Target Depth (m)
  - Length of Mainline\* (m)
  - No. of Floats
  - Begin Set Lat and Long Coordinates
  - End Set Lat and Long Coordinates
  - $H_a$  = Length of Branchline (m)
  - $H_b$  = Length of Floatline (m)
  - $j$  = Hook Number Turtle was Caught
  - $N$  = Hooks Between Floats +1 (add 1 to the value taken from the observer report)

**\*Make sure to convert values into meters.  
i.e., Length of mainline is given in nautical miles.**

3. Calculate  $L$  = Length of Mainline Between floats (m)
  - Calculated by length of mainline (m)/ number of floats in a set
4. Calculate  $H$  = Great Circle Distance (km)
  - Calculated by the lat/long coordinates at the start and end of each **SET**, not the haul
  - Use <http://www.movable-type.co.uk/scripts/latlong.html> to calculate the great circle distance by inputting the coordinates
5. Calculate  $S$  = sag ratio =  $L/H$ 
  - Calculated by length of mainline (m)/ great circle distance (m)
  - The smaller and larger values correspond to lesser and greater sag ratios, respectively
  - Used for illustrative purposes
6. Calculate  $S$  = sag ratio =  $H/L$ 
  - Calculated by great circle distance (m)/ length of mainline (m)
  - Used for the R code
  - Plug this value into the last line of the code  
i.e., - `sagrate.angle2(0.65)`

### Hook Depths R Code

```
##### Function for calculating angle from sag ratio finer estimation
angle <- 1:2
names(angle) <- c("angle", "convergence")
angle <- data.frame(angle)
sagrate.angle2 <- function(sagrate)
{
  for(i in 1:length(sagrate))
  {
    print(i)
    print(sagrate[i])
    tmp4 <- 1
    # consider sagrates from 0.28 to 0.96
    for(j in 28000:96000)
    {
      k <- j/1000.0
      tmp <- tan(k*pi/180)
      tmp2 <- sinh(tmp*sagrate[i])
      tmp3 <- abs(tmp-tmp2)
      if(tmp3<0.01)
      {
        if(tmp3<tmp4 && k<85 && k>27.999)
        {
          tmp4 <- tmp3
          angle$angle[i]<-k
          angle$convergence[i]<-tmp3
        }
      }
    }
    # print(tmp4)
  }
}
return(angle)
}
sagrate.angle2(0.65) → value in ( ) from sag ratio
```

#### 7. Retrieve Catenary Angle (given in degrees)

- This value is produced by the R code

R Code Format:      `sagrate.angle2(0.65)`  
                    [1] 1  
                    [1] 0.65  
                    angle convergence  
                    angle 68.802 1.384423e-05  
                    convergence 2.000 9.971286e-03

Answers for each possible two-decimal place sag ratio are shown in Table S1 below, which eliminates the need for using R.

8. Calculate  $D_j$  = theoretical depth of catenary hook
  - Calculated with equation below
  - This is the theoretical value of the depth

Google Spreadsheet Formula:

$$D_j = H_a + H_b + (L/2) * ((1 + \text{COT}(\text{RADIANS}(\text{CatAngle}))^2)^{0.5} - ((1 - 2 * (j/N))^2 + \text{COT}(\text{RADIANS}(\text{CatAngle}))^2)^{0.5})$$

9. Percent shoaling must be applied to theoretical depth of catenary hook
  - This generates the estimated actual depth of the hook
  - This compensates for environmental factors (wind stress, current velocity, etc.) that will affect the theoretical depth as the longline sways through the water column

### **Important Notes**

**Use % Shoaling (Positive Only) From Bigelow et al (2006):  
Deep set, Method 1**

**Mean, S.D., median and range (in parentheses): 39.1 % ± 19.3 %, 39.8 % (1 %–85 %,  $n = 141$ )**

Method 1 was used instead of Method 2. Method 2 requires the speed of the line thrower, which was not provided in the observer reports.

Shallow vs Deep Set:

**Swordfish gear (shallow)** is characterized as the ‘Gulf of Mexico’ style <sup>2</sup> which typically **deploys four HBF** (hooks between floats) and is kept relatively taut to **target the upper 30–90 m of water column** <sup>3</sup>. **Tuna (deep)** fishing uses a line thrower to put sag in the longline and **deploys a greater number of HBF to reach depths of □400 m** <sup>4</sup>.

Estimations made when certain data were missing for a turtle:

- (1) If the calculated sag ratio was  $< 0.28$ , the catenary angles was set to  $84.838^\circ$ .
- (2) If the calculated sag ratio was  $> 0.96$ , the catenary angle was set to  $28^\circ$ .
- (3) If the length of the mainline deployed was missing, the length of the mainline from the same vessel for a different turtle was used.

Table S1. R outputs from code shown above to calculate catenary angle from sag ratios.

| Sag ratio | Catenary Angle (degrees) |  | Sag ratio | Catenary Angle (degrees) |
|-----------|--------------------------|--|-----------|--------------------------|
| 0.28      | 84.838                   |  | 0.62      | 70.728                   |
| 0.29      | 84.564                   |  | 0.63      | 70.104                   |
| 0.30      | 84.284                   |  | 0.64      | 69.462                   |
| 0.31      | 83.998                   |  | 0.65      | 68.802                   |
| 0.32      | 83.704                   |  | 0.66      | 68.122                   |
| 0.33      | 83.404                   |  | 0.67      | 67.423                   |
| 0.34      | 83.096                   |  | 0.68      | 66.702                   |
| 0.35      | 82.782                   |  | 0.69      | 65.959                   |
| 0.36      | 82.460                   |  | 0.70      | 65.193                   |
| 0.37      | 82.130                   |  | 0.71      | 64.402                   |
| 0.38      | 81.793                   |  | 0.72      | 63.586                   |
| 0.39      | 81.447                   |  | 0.73      | 62.743                   |
| 0.40      | 81.094                   |  | 0.74      | 61.871                   |
| 0.41      | 80.733                   |  | 0.75      | 60.968                   |
| 0.42      | 80.363                   |  | 0.76      | 60.033                   |
| 0.43      | 79.984                   |  | 0.77      | 59.064                   |
| 0.44      | 79.596                   |  | 0.78      | 58.058                   |
| 0.45      | 79.199                   |  | 0.79      | 57.013                   |
| 0.46      | 78.793                   |  | 0.80      | 55.925                   |
| 0.47      | 78.377                   |  | 0.81      | 54.793                   |
| 0.48      | 77.950                   |  | 0.82      | 53.612                   |
| 0.49      | 77.514                   |  | 0.83      | 52.378                   |
| 0.50      | 77.067                   |  | 0.84      | 51.087                   |
| 0.51      | 76.609                   |  | 0.85      | 49.733                   |
| 0.52      | 76.139                   |  | 0.86      | 48.309                   |
| 0.53      | 75.658                   |  | 0.87      | 46.810                   |
| 0.54      | 75.165                   |  | 0.88      | 45.225                   |
| 0.55      | 74.659                   |  | 0.89      | 43.544                   |
| 0.56      | 74.141                   |  | 0.90      | 41.756                   |
| 0.57      | 73.609                   |  | 0.91      | 39.842                   |
| 0.58      | 73.063                   |  | 0.92      | 37.783                   |
| 0.59      | 72.502                   |  | 0.93      | 35.552                   |
| 0.60      | 71.927                   |  | 0.94      | 33.112                   |
| 0.61      | 71.336                   |  | 0.95      | 30.411                   |
|           |                          |  | 0.96      | 28.000                   |

Table S2. Mean, median, range, one standard deviation (SD), and percent occurrence of the mass (g) of high-density polyethylene (HDPE), polyvinyl chloride (PVC), low-density polyethylene (LDPE), polypropylene (PP), polystyrene (PS), unknown polyethylene (unknown PE), polyurethane, nylon, PE/PP mixture, unknown, grouped floating, and grouped sinking plastic fragments ingested by olive ridley (n = 37), green (n = 9), and loggerhead (n = 4) sea turtles. Resin codes are shown in parenthesis. Minimum mass of all pieces analyzed was 0.00097 g.

| Mass of ingested plastics (g) |       |        |              |       |              |
|-------------------------------|-------|--------|--------------|-------|--------------|
| Olive Ridley                  |       |        |              |       |              |
| Polymer                       | Mean  | Median | Range        | SD    | % occurrence |
| HDPE (#2)                     | 0.377 | 0      | 0 - 3.11     | 0.770 | 40.5         |
| PVC (#3)                      | 0.377 | 0      | 0 - 1.66     | 0.770 | 2.70         |
| LDPE (#4)                     | 2.72  | 0.900  | 0 - 17.78    | 4.30  | 91.9         |
| PP (#5)                       | 2.64  | 1.08   | 0 - 15.3     | 4.30  | 89.2         |
| PS (#6)                       | 0.020 | 0      | 0 - 0.363    | 0.060 | 13.5         |
| Unknown PE                    | 0.550 | 0.330  | 0 - 2.71     | 0.670 | 64.9         |
| Polyurethane (#7)             | 0.180 | 0      | 0 - 5.03     | 0.850 | 8.11         |
| Nylon (#7)                    | 0.030 | 0      | 0 - 0.948    | 0.160 | 2.70         |
| PE/PP Mixture                 | 0.080 | 0      | 0 - 0.723    | 0.190 | 29.7         |
| Unknown                       | 0.100 | 0      | 0 - 3.38     | 0.560 | 13.5         |
| Floating                      | 6.38  | 3.99   | 0.018 - 36.1 | 7.59  | 100          |
| Sinking                       | 0.365 | 0      | 0 - 5.03     | 1.03  | 37.8         |
| Green                         |       |        |              |       |              |
| Polymer                       | Mean  | Median | Range        | SD    | % occurrence |
| HDPE (#2)                     | 1.50  | 0.390  | 0 - 5.76     | 2.08  | 66.7         |
| PVC (#3)                      | 0     | 0      | 0            | 0     | 0            |
| LDPE (#4)                     | 10.2  | 9.91   | 0.068 - 28.8 | 9.10  | 100          |
| PP (#5)                       | 3.55  | 3.05   | 0.309 - 11.2 | 3.62  | 100          |
| PS (#6)                       | 0.050 | 0      | 0 - 0.309    | 0.110 | 22.2         |
| Unknown PE                    | 3.34  | 1.56   | 0.132 - 13.1 | 4.22  | 100          |
| Polyurethane (#7)             | 0.210 | 0      | 0 - 1.89     | 0.630 | 11.1         |
| Nylon (#7)                    | 0     | 0      | 0            | 0     | 0            |
| PE/PP Mixture                 | 2.73  | 0.250  | 0 - 11.2     | 3.81  | 77.8         |
| Unknown                       | 0.070 | 0      | 0 - 0.582    | 0.190 | 22.2         |
| Floating                      | 21.3  | 17.9   | 0.859 - 44.2 | 16.4  | 100          |
| Sinking                       | 0.326 | 0      | 0 - 1.89     | 0.633 | 44.4         |
| Loggerhead                    |       |        |              |       |              |
| Polymer                       | Mean  | Median | Range        | SD    | % occurrence |
| HDPE (#2)                     | 0.560 | 0.300  | 0 - 1.64     | 0.780 | 50.0         |
| PVC (#3)                      | 0     | 0      | 0            | 0     | 0            |
| LDPE (#4)                     | 27.5  | 23.8   | 2.18 - 60.3  | 27.6  | 100          |
| PP (#5)                       | 5.60  | 3.37   | 0 - 15.7     | 7.35  | 75.0         |
| PS (#6)                       | 0     | 0      | 0            | 0     | 0            |
| Unknown PE                    | 2.06  | 1.08   | 0 - 6.07     | 2.73  | 75.0         |
| Polyurethane (#7)             | 0.110 | 0      | 0 - 0.447    | 0.220 | 25.0         |
| Nylon (#7)                    | 0     | 0      | 0            | 0     | 0            |
| PE/PP Mixture                 | 0.840 | 0.800  | 0 - 1.75     | 0.760 | 75.0         |
| Unknown                       | 0.090 | 0.010  | 0 - 0.327    | 0.160 | 50.0         |
| Floating                      | 36.5  | 36.4   | 4.07 - 69.3  | 34.1  | 100          |
| Sinking                       | 0.199 | 0.175  | 0 - 0.447    | 0.223 | 75.0         |

Table S3. Mean, median, range, and one standard deviation (SD) of the percent mass of high-density polyethylene (HDPE), polyvinyl chloride (PVC), low-density polyethylene (LDPE), polypropylene (PP), polystyrene (PS), unknown polyethylene (unknown PE), polyurethane, nylon, PE/PP mixture, unknown, grouped floating, and grouped sinking plastic pieces ingested by olive ridley (n = 37), green (n = 9), and loggerhead (n = 4) sea turtles.

| % mass of ingested plastics |       |        |             |       |
|-----------------------------|-------|--------|-------------|-------|
| Olive Ridley                |       |        |             |       |
| Polymer                     | Mean  | Median | Range       | SD    |
| HDPE (#2)                   | 6.09  | 0      | 0 - 54.9    | 12.6  |
| PVC (#3)                    | 1.52  | 0      | 0 - 56.2    | 9.24  |
| LDPE (#4)                   | 41.9  | 35.6   | 0 - 100     | 30.4  |
| PP (#5)                     | 35.2  | 31.0   | 0 - 100     | 29.4  |
| PS (#6)                     | 0.240 | 0      | 0 - 4.02    | 0.850 |
| Unknown PE                  | 8.96  | 4.61   | 0 - 37.9    | 10.7  |
| Polyurethane (#7)           | 1.66  | 0      | 0 - 37.1    | 7.14  |
| Nylon (#7)                  | 2.32  | 0      | 0 - 85.8    | 14.1  |
| PE/PP Mixture               | 1.17  | 0      | 0 - 12.3    | 2.77  |
| Unknown                     | 0.950 | 0      | 0 - 30.5    | 5.01  |
| Floating                    | 93.3  | 100    | 14.2 - 100  | 18.4  |
| Sinking                     | 6.69  | 0      | 0 - 85.8    | 18.4  |
| Green                       |       |        |             |       |
| Polymer                     | Mean  | Median | Range       | SD    |
| HDPE (#2)                   | 5.66  | 3.50   | 0 - 17.1    | 6.36  |
| PVC (#3)                    | 0     | 0      | 0           | 0     |
| LDPE (#4)                   | 44.4  | 40.3   | 5.61 - 70.7 | 21.6  |
| PP (#5)                     | 18.2  | 17.0   | 1.11 - 26.5 | 8.47  |
| PS (#6)                     | 2.88  | 0      | 0 - 25.6    | 8.53  |
| Unknown PE                  | 17.5  | 15.0   | 1.93 - 35.3 | 24.1  |
| Polyurethane (#7)           | 0.620 | 0      | 0 - 5.61    | 1.87  |
| Nylon (#7)                  | 0     | 0      | 0           | 0     |
| PE/PP Mixture               | 10.6  | 9.81   | 0 - 37.2    | 12.0  |
| Unknown                     | 0.160 | 0      | 0 - 1.30    | 0.430 |
| Floating                    | 96.3  | 100    | 74.4 - 100  | 8.44  |
| Sinking                     | 3.67  | 0      | 0 - 25.6    | 8.44  |
| Loggerhead                  |       |        |             |       |
| Polymer                     | Mean  | Median | Range       | SD    |
| HDPE (#2)                   | 11.4  | 2.76   | 0 - 40.2    | 19.4  |
| PVC (#3)                    | 0     | 0      | 0           | 0     |
| LDPE (#4)                   | 67.9  | 65.8   | 53.2 - 86.9 | 14.1  |
| PP (#5)                     | 10.1  | 7.70   | 0 - 24.9    | 10.6  |
| PS (#6)                     | 0     | 0      | 0           | 0     |
| Unknown PE                  | 5.84  | 5.42   | 0 - 12.5    | 6.20  |
| Polyurethane (#7)           | 1.04  | 0      | 0 - 4.15    | 2.07  |
| Nylon (#7)                  | 0     | 0      | 0           | 0     |
| PE/PP Mixture               | 3.42  | 1.64   | 0 - 10.4    | 4.78  |
| Unknown                     | 0.260 | 0.260  | 0 - 0.53    | 0.300 |
| Floating                    | 98.7  | 99.5   | 95.9 - 100  | 1.91  |
| Sinking                     | 1.30  | 0.526  | 0 - 4.15    | 1.91  |

Table S4. Estimated catenary hook depths, catenary hook depths corrected for shoaling, and notes on estimations made for missing data for olive ridley (n = 37), green (n = 9), and loggerhead (n = 4) sea turtles caught as bycatch by Pacific longline fisheries.

| Turtle ID | Species                  | Predicted catenary depth (m) | Catenary depth with 39.1% shoaling (m) | Estimations                                                                                                                                                                           |
|-----------|--------------------------|------------------------------|----------------------------------------|---------------------------------------------------------------------------------------------------------------------------------------------------------------------------------------|
| LL445715  | Lepidochelys olivacea    | 145                          | 88.3                                   |                                                                                                                                                                                       |
| LL444515  | Lepidochelys olivacea    | 449                          | 274                                    | sag ratio <0.28, so set cat. angle to 84.838                                                                                                                                          |
| LL441507  | Lepidochelys olivacea    | 192                          | 117                                    |                                                                                                                                                                                       |
| LL431606  | Lepidochelys olivacea    | 72.9                         | 44.4                                   | sag ratio >0.96, so set cat. angle to 28                                                                                                                                              |
| LL431609  | Lepidochelys olivacea    | 72.0                         | 43.8                                   | sag ratio >0.96, so set cat. angle to 28                                                                                                                                              |
| AS013413  | Lepidochelys olivacea    | 322                          | 196                                    |                                                                                                                                                                                       |
| LL450502  | Lepidochelys olivacea    | 0                            | 0                                      | main line length missing, used average of all trips; hook number was missing, estimated shallowest as hook # 1 = 53.69432131, deepest as hook #15 = 248.300886 , can't estimate depth |
| LL452515  | Lepidochelys olivacea    | 0                            | 0                                      | missing too much, can't calculate depth                                                                                                                                               |
| LL458504  | Lepidochelys olivacea    | 98.9                         | 60.2                                   |                                                                                                                                                                                       |
| LL461308  | Lepidochelys olivacea    | 76.2                         | 46.4                                   | sag ratio >0.96, so set cat. angle to 28                                                                                                                                              |
| LL460203  | Lepidochelys olivacea    | 62.9                         | 38.3                                   | sag ratio >0.96, so set cat. angle to 28                                                                                                                                              |
| LL468213  | Lepidochelys olivacea    | 44.9                         | 27.3                                   | sag ratio >0.96, so set cat. angle to 28                                                                                                                                              |
| LL469204  | Lepidochelys olivacea    | 208                          | 126                                    |                                                                                                                                                                                       |
| LL477006  | Lepidochelys olivacea    | 71.3                         | 43.4                                   |                                                                                                                                                                                       |
| LL481001  | Lepidochelys olivacea    | 101                          | 61.4                                   | sag ratio >0.96, so set cat. angle to 28                                                                                                                                              |
| LL489701  | Lepidochelys olivacea    | 173                          | 106                                    |                                                                                                                                                                                       |
| LL490008  | Lepidochelys olivacea    | 71.6                         | 43.6                                   | sag ratio >0.96, so set cat. angle to 28                                                                                                                                              |
| LL492013  | Lepidochelys olivacea    | 103                          | 62.5                                   | sag ratio >0.96, so set cat. angle to 28                                                                                                                                              |
| LL514915  | Lepidochelys olivacea    | 149                          | 90.5                                   |                                                                                                                                                                                       |
| LL515309  | Lepidochelys olivacea    | 107                          | 64.9                                   | sag ratio >0.96, so set cat. angle to 28                                                                                                                                              |
| LL517203  | Lepidochelys olivacea    | 34.9                         | 21.3                                   |                                                                                                                                                                                       |
| LL519305  | Lepidochelys olivacea    | 247                          | 150                                    |                                                                                                                                                                                       |
| LL525509  | Lepidochelys olivacea    | 48.9                         | 29.8                                   |                                                                                                                                                                                       |
| LL527602  | Lepidochelys olivacea    | 75.4                         | 45.9                                   | sag ratio >0.96, so set cat. angle to 28                                                                                                                                              |
| LL528412  | Lepidochelys olivacea    | 32.8                         | 20.0                                   |                                                                                                                                                                                       |
| LL530504  | Lepidochelys olivacea    | 44.3                         | 27.0                                   | sag ratio >0.96, so set cat. angle to 28                                                                                                                                              |
| LL531413  | Lepidochelys olivacea    | 80.7                         | 49.1                                   | sag ratio >0.96, so set cat. angle to 28                                                                                                                                              |
| LL531416  | Lepidochelys olivacea    | 49.6                         | 30.2                                   |                                                                                                                                                                                       |
| LL532410  | Lepidochelys olivacea    | 87.5                         | 53.3                                   | sag ratio >0.96, so set cat. angle to 28                                                                                                                                              |
| LL543605  | Lepidochelys olivacea    | 72.1                         | 43.9                                   | sag ratio >0.96, so set cat. angle to 28                                                                                                                                              |
| LL554318  | Lepidochelys olivacea    | 78.6                         | 47.9                                   | sag ratio >0.96, so set cat. angle to 28                                                                                                                                              |
| LL556214  | Lepidochelys olivacea    | 65.1                         | 39.6                                   | sag ratio >0.96, so set cat. angle to 28                                                                                                                                              |
| LL550302  | Lepidochelys olivacea    | 113                          | 68.6                                   | sag ratio >0.96, so set cat. angle to 28                                                                                                                                              |
| LL552302  | Lepidochelys olivacea    | 113                          | 69.0                                   | sag ratio >0.96, so set cat. angle to 28                                                                                                                                              |
| LL556106  | Lepidochelys olivacea    | 130                          | 79.1                                   |                                                                                                                                                                                       |
| LL445510  | Lepidochelys olivacea    | 47.1                         | 28.7                                   | sag ratio >0.96, so set cat. angle to 28                                                                                                                                              |
| LL474511  | Lepidochelys olivacea    | 94.2                         | 57.4                                   | sag ratio >0.96, so set cat. angle to 28                                                                                                                                              |
| LL476104  | Chelonia mydas           | 104                          | 63.4                                   |                                                                                                                                                                                       |
| LL480011  | Chelonia mydas           | 179                          | 109                                    |                                                                                                                                                                                       |
| AS015316  | Chelonia mydas           | 120.4                        | 73.3                                   |                                                                                                                                                                                       |
| AS015728  | Chelonia mydas           | 100                          | 60.9                                   | sag ratio <0.28, so set cat. angle to 84.838                                                                                                                                          |
| AS015808  | Chelonia mydas           | 177                          | 108                                    |                                                                                                                                                                                       |
| LL493312  | Chelonia mydas agassizii | 104                          | 63.5                                   | sag ratio >0.96, so set cat. angle to 28                                                                                                                                              |
| LL513310  | Chelonia mydas           | 55.6                         | 33.8                                   |                                                                                                                                                                                       |
| AS019908  | Chelonia mydas           | 76.1                         | 46.4                                   |                                                                                                                                                                                       |
| LL547906  | Chelonia mydas agassizii | 51.8                         | 31.6                                   | sag ratio >0.96, so set cat. angle to 28                                                                                                                                              |
| LL456601  | Caretta caretta          | 45.7                         | 27.8                                   | main line length missing, found length on same vessel 3 years later, sag ratio >1 so used max cat angle                                                                               |
| LL520119  | Caretta caretta          | 49.2                         | 30.0                                   | sag ratio >0.96, so set cat. angle to 28                                                                                                                                              |
| LL544407  | Caretta caretta          | 46.4                         | 28.3                                   | sag ratio >0.96, so set cat. angle to 28                                                                                                                                              |
| LL554807  | Caretta caretta          | 51.4                         | 31.3                                   | sag ratio >0.96, so set cat. angle to 28                                                                                                                                              |



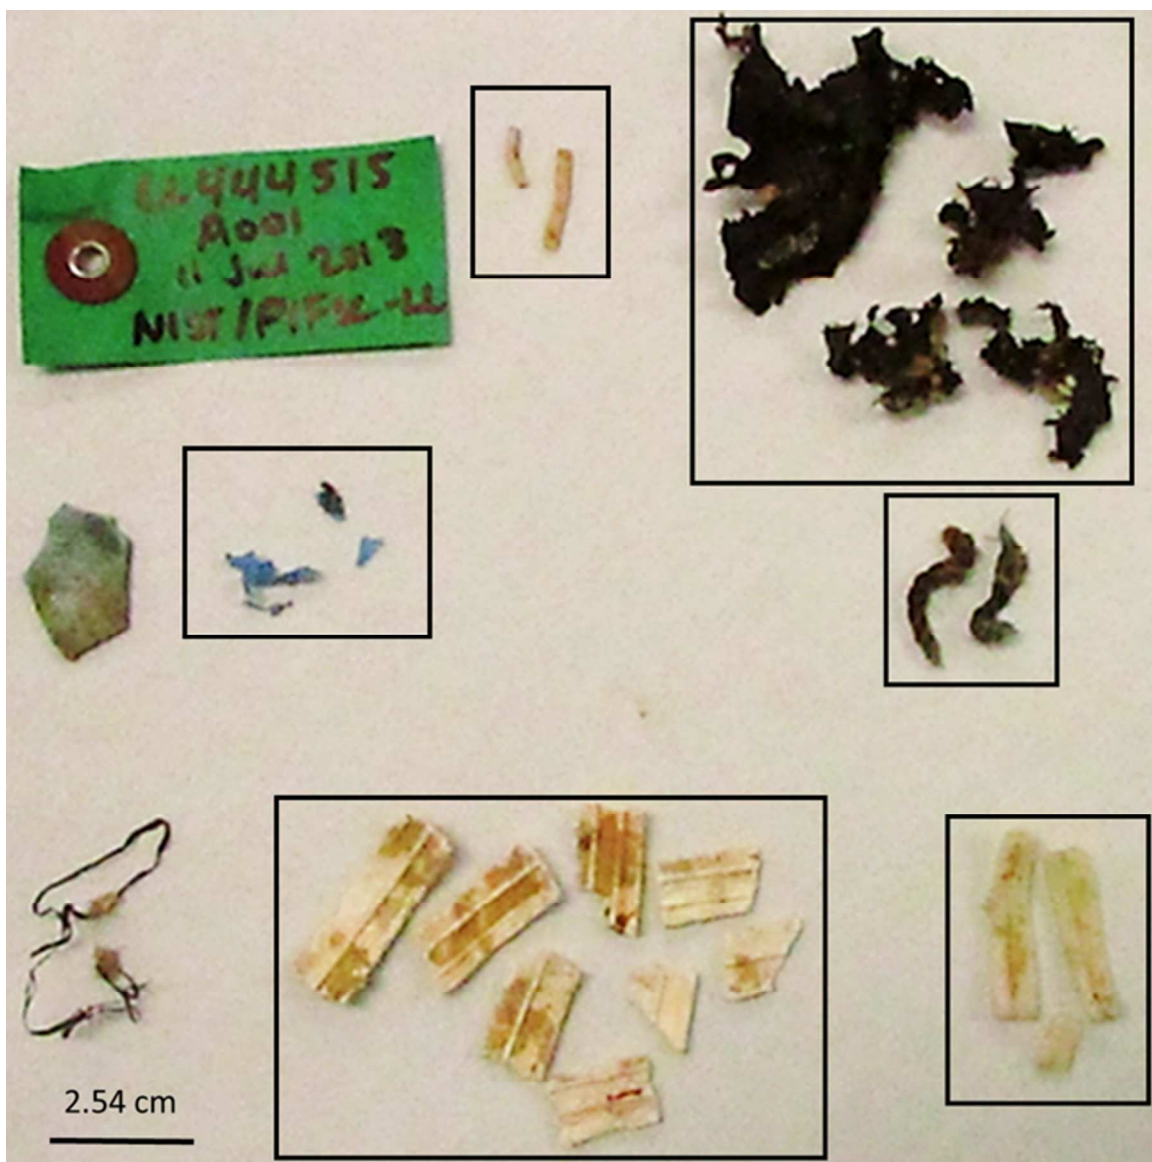

Figure S1. Recognizable groups of ingested plastics assumed to have come from the same larger item based on color, thickness, and texture from an olive ridley turtle. Groups are shown inside black rectangles.

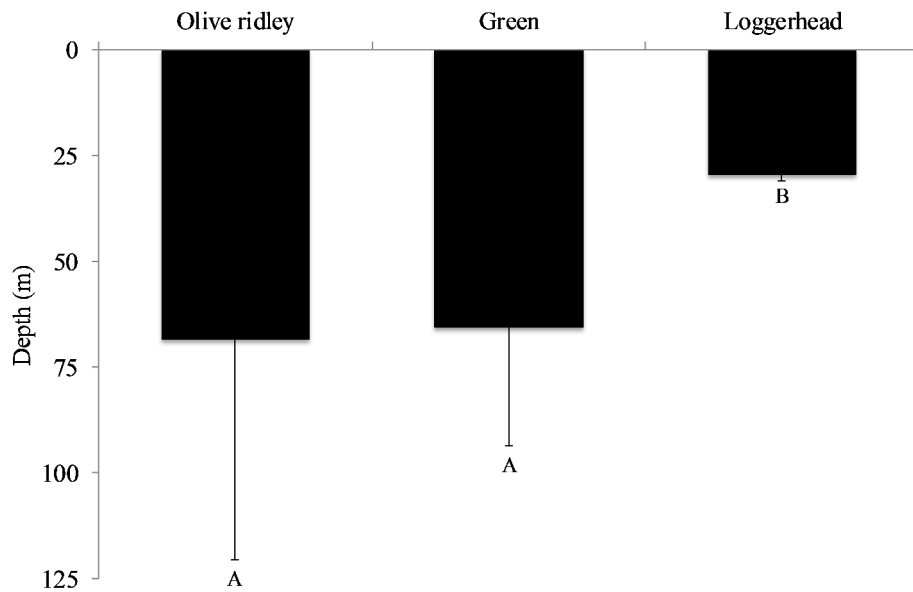

Figure S2. Mean and standard deviation of hook depths (m) corrected for shoaling for olive ridley ( $n = 35$ ), green ( $n = 9$ ), and loggerhead ( $n = 4$ ) turtles caught as bycatch in Pacific longline fisheries. Different letters below bars indicate statistically significant differences among species ( $p < 0.05$ ); olive ridley and green turtles dive deeper than loggerhead turtles.

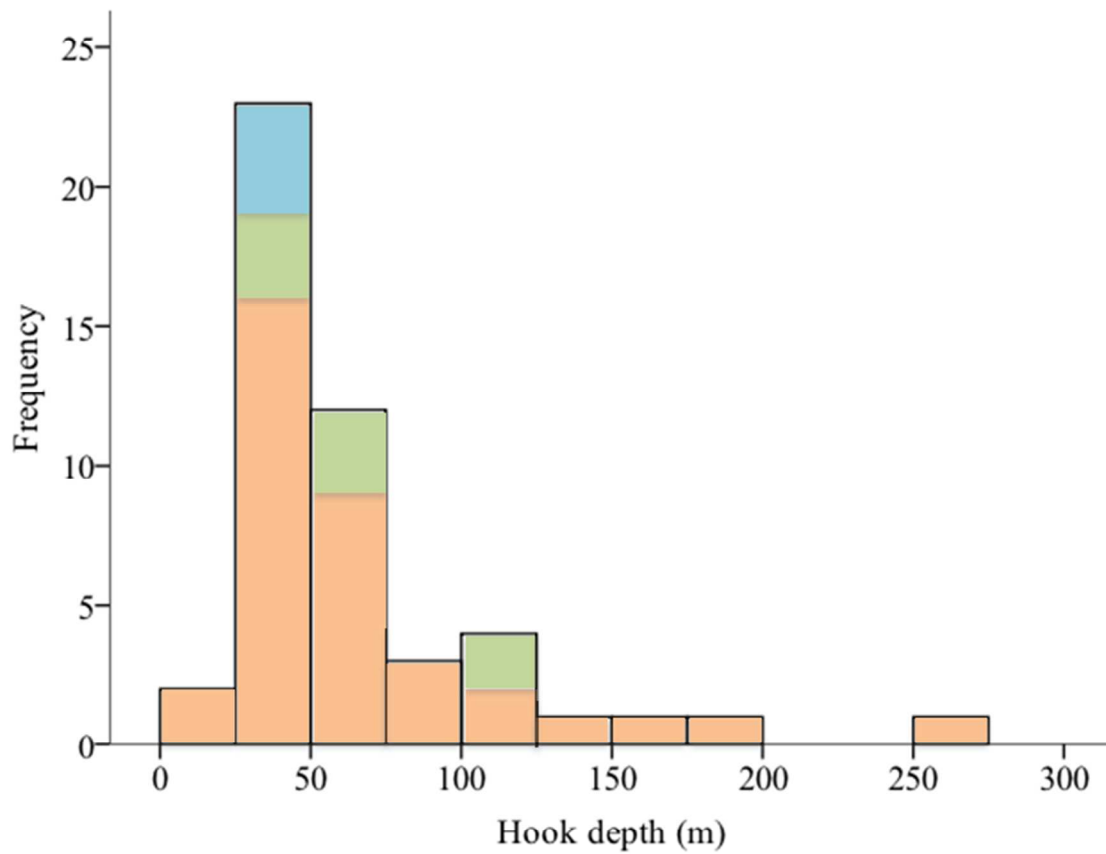

Figure S3. Histogram of hook depths (m) corrected for shoaling for olive ridley ( $n = 35$ , orange), green ( $n = 9$ , green), and loggerhead ( $n = 4$ , blue) turtles caught as bycatch in Pacific deep-set longline fisheries. Hook depths estimated using method 1 from Bigelow et al. (2006).

A.

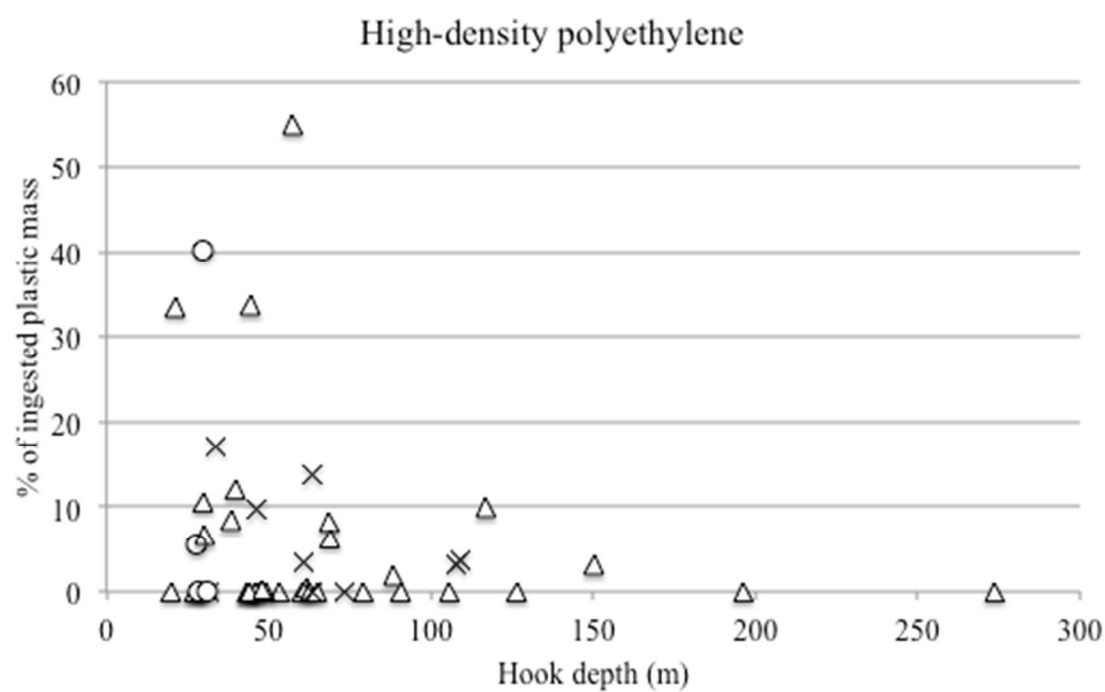

B.

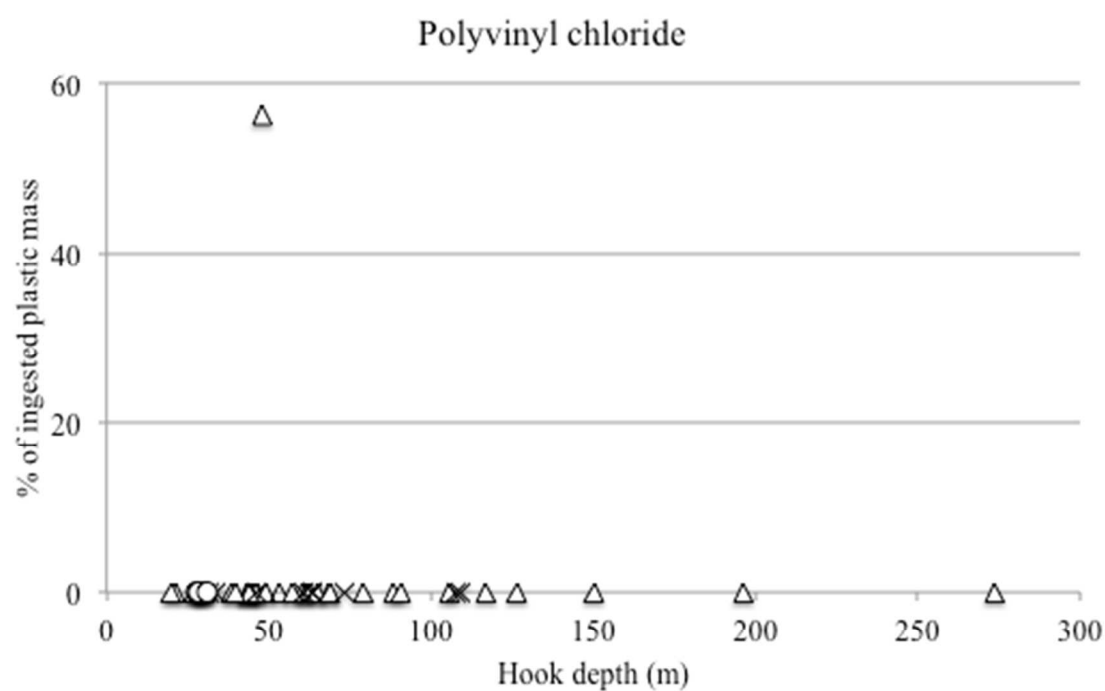

C.

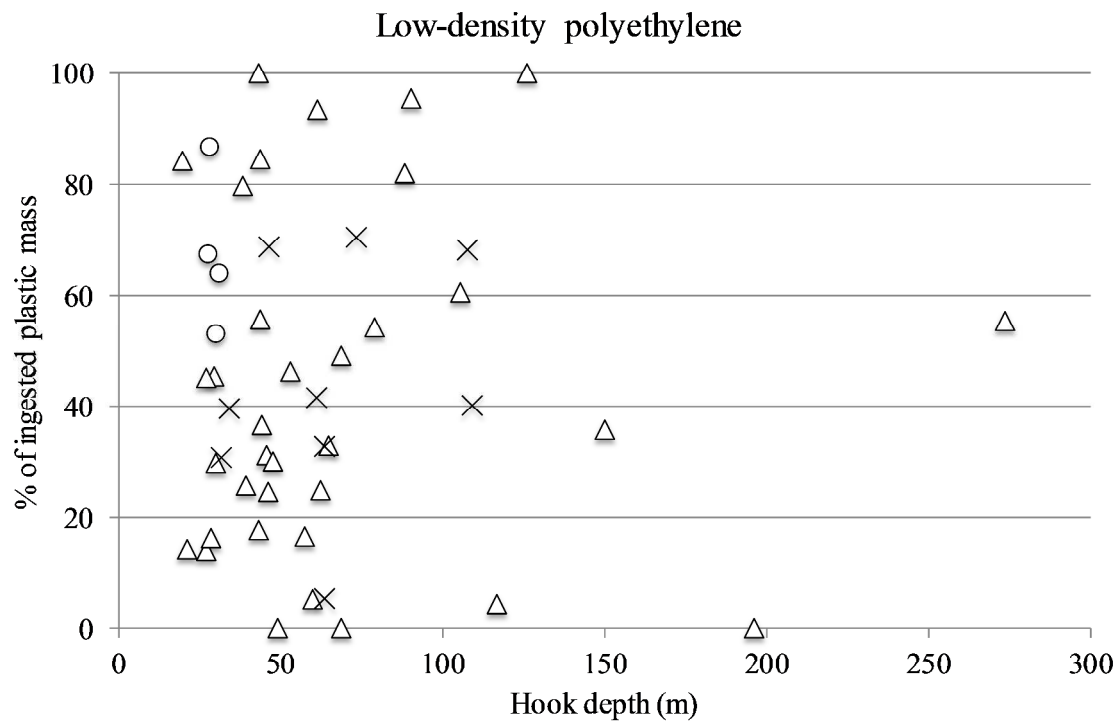

D.

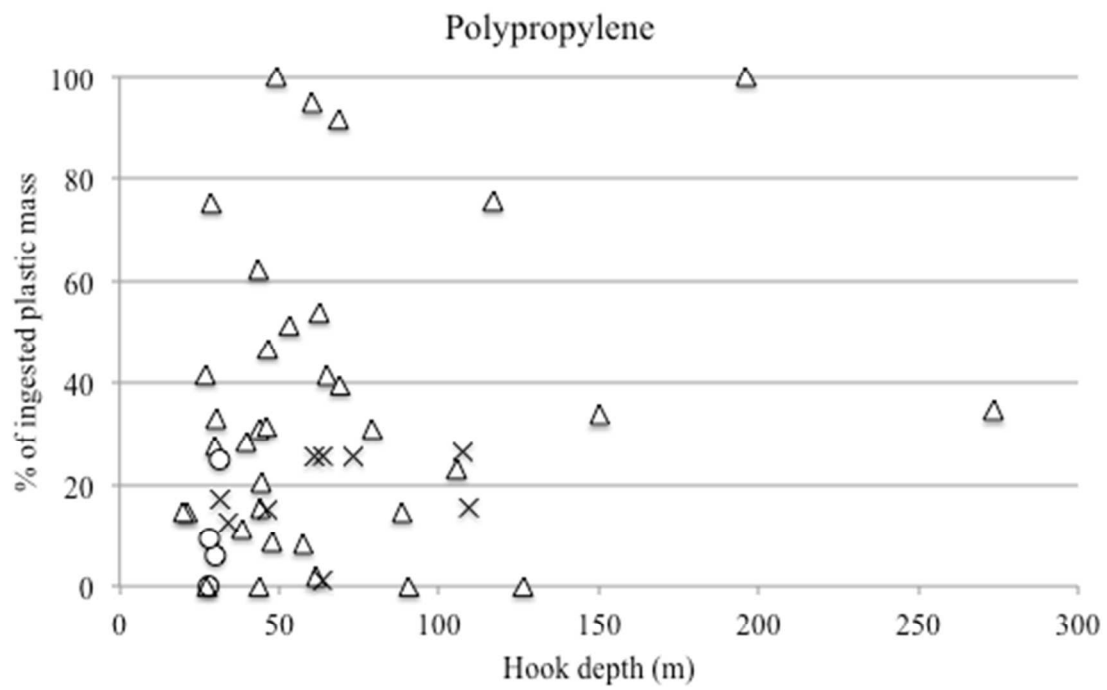

E.

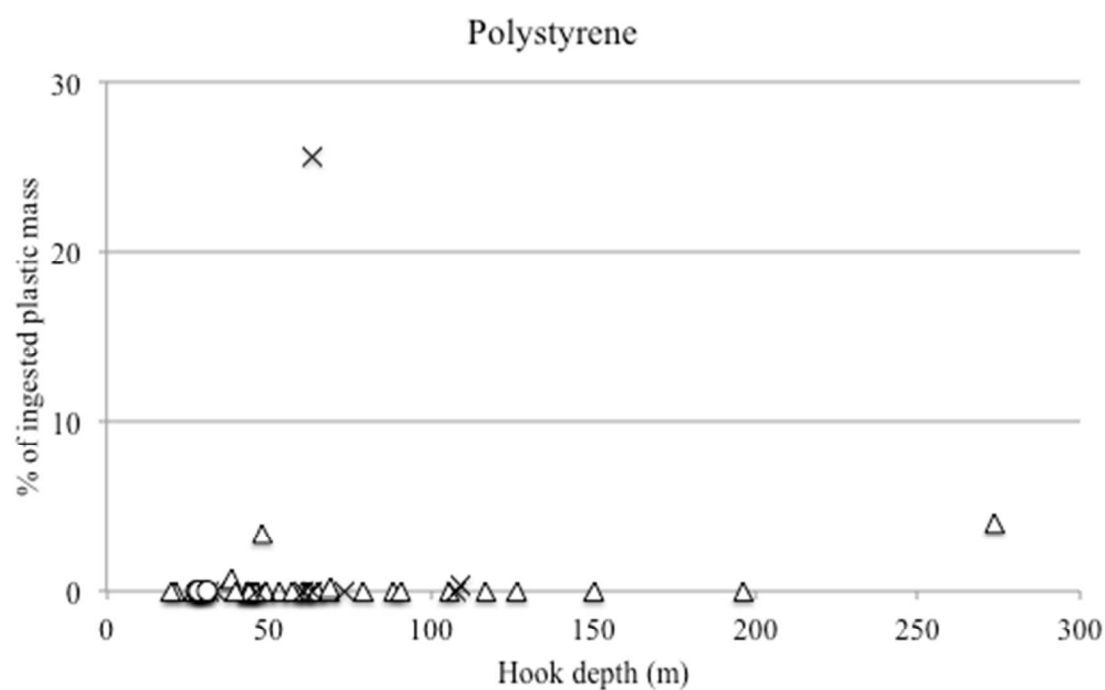

F.

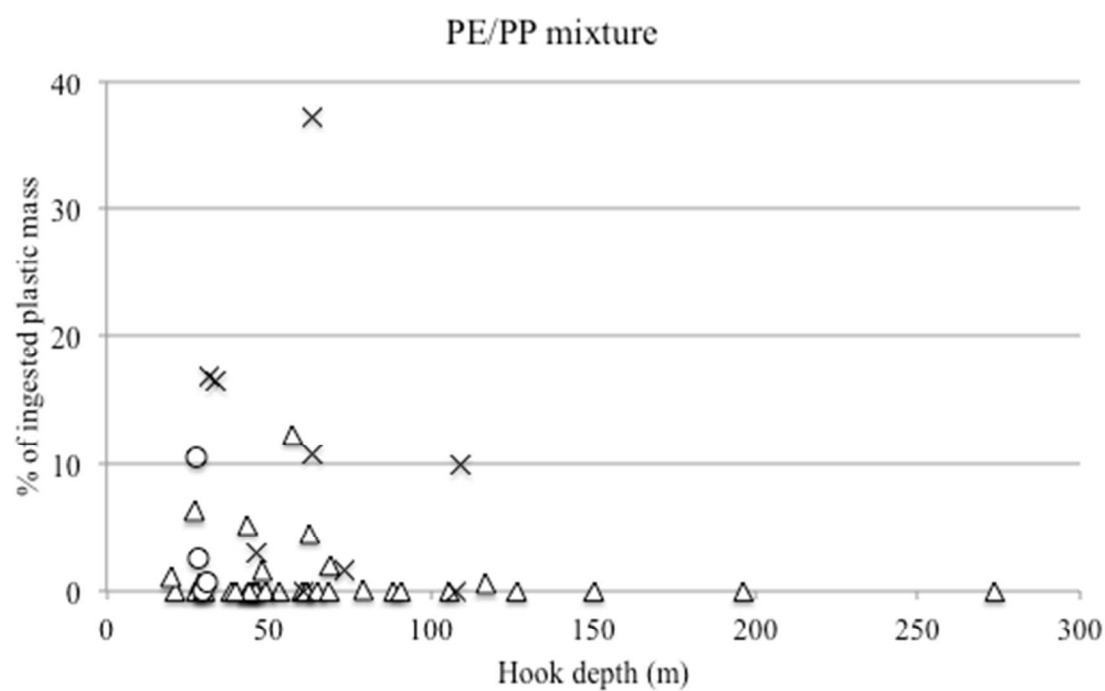

G.

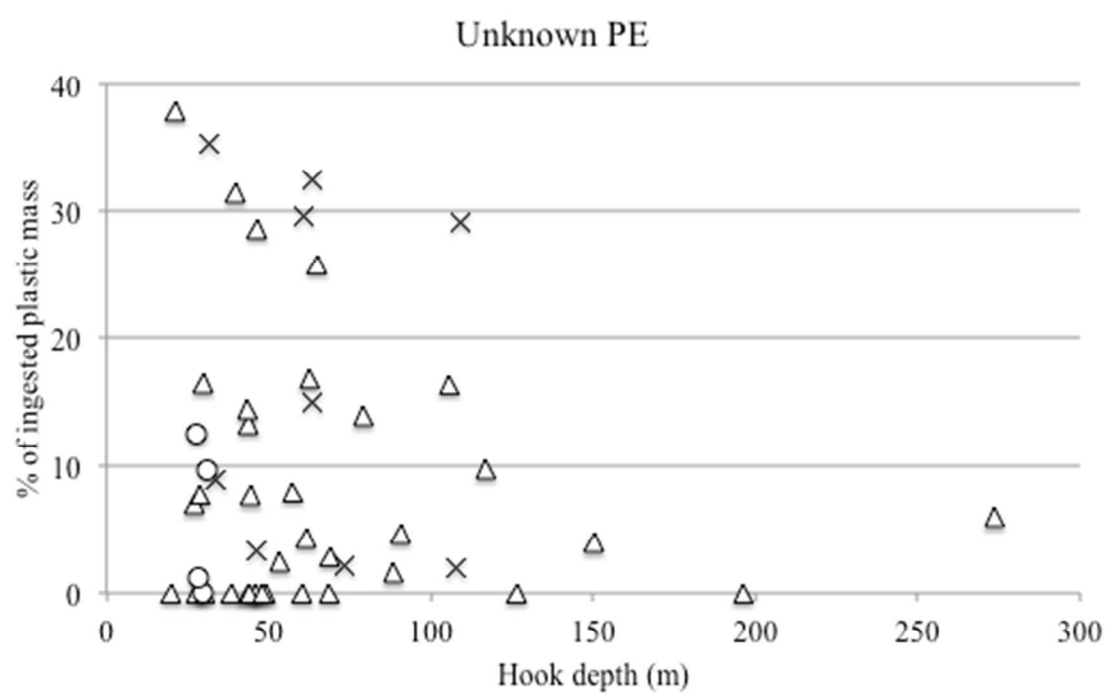

H.

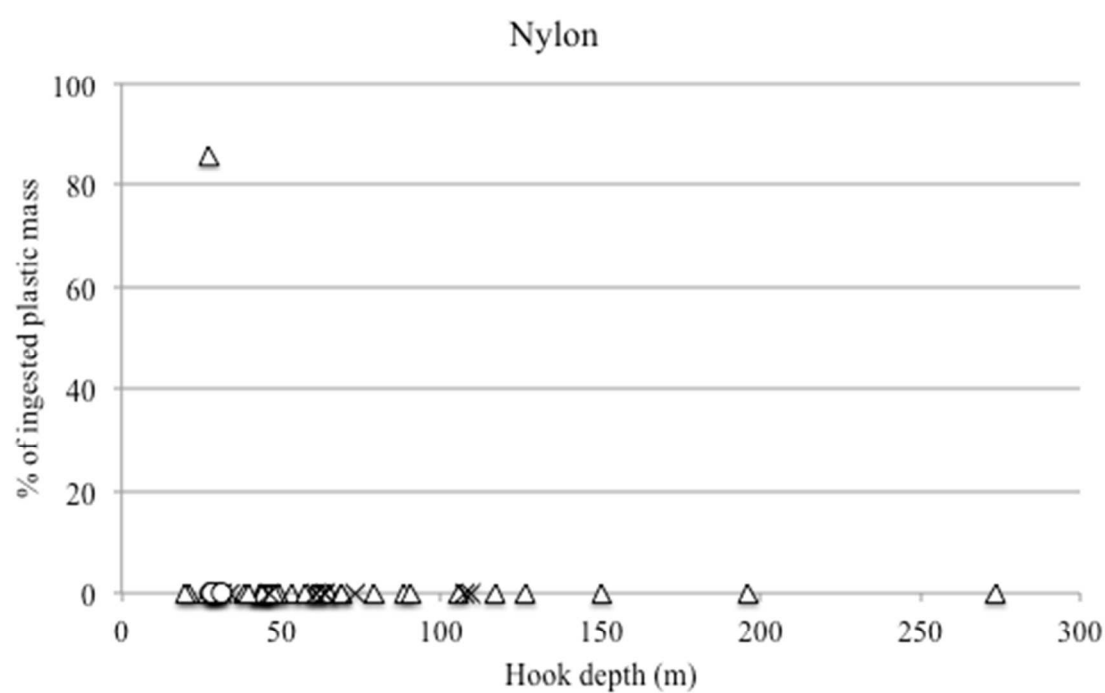

I.

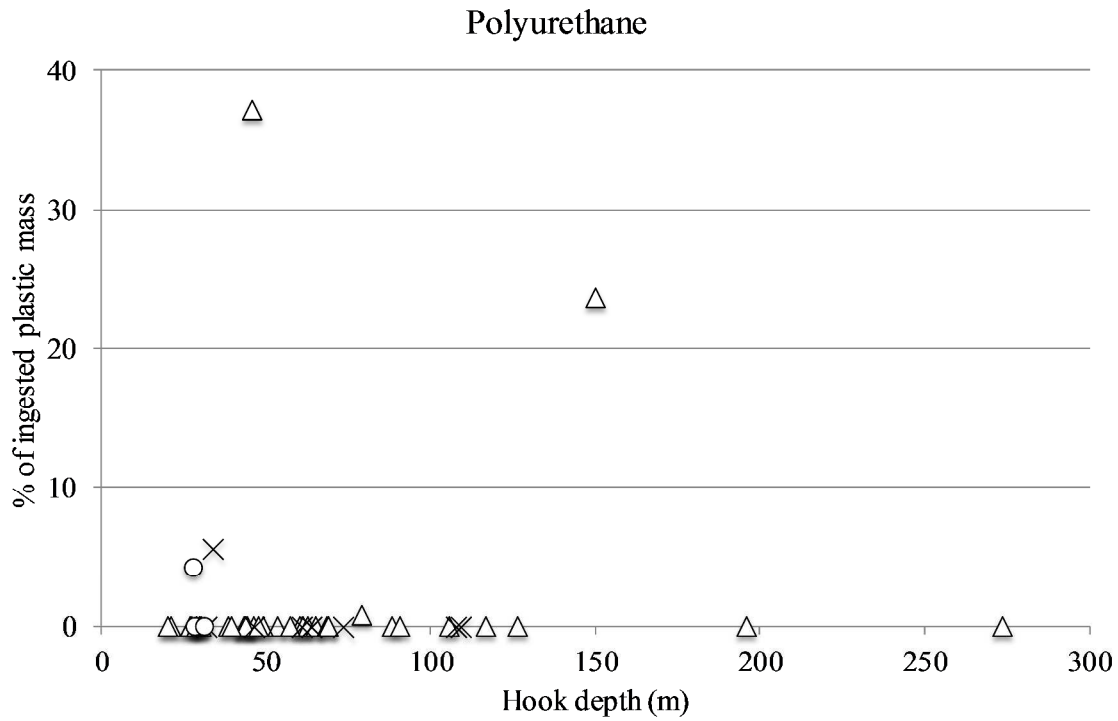

J.

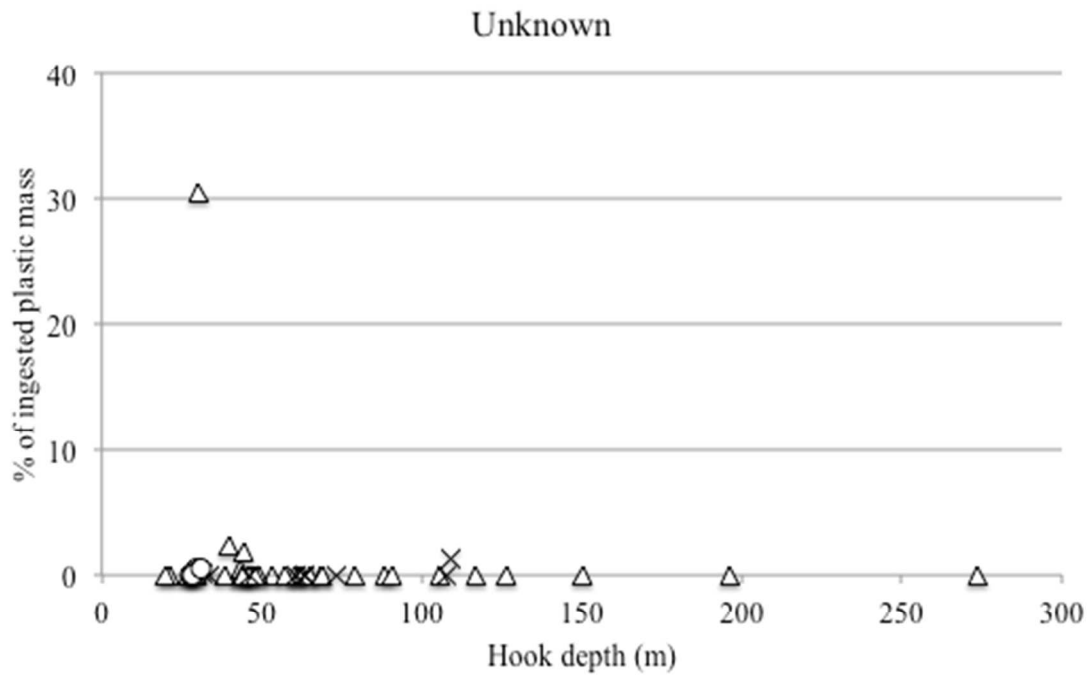

Figure S4. Percent of ingested plastic mass of a) high-density polyethylene (HDPE), b) polyvinyl chloride (PVC), c) low-density polyethylene (LDPE), d) polypropylene (PP), e) polystyrene (PS), f) PE/PP mixture, g) unknown polyethylene (PE), h) nylon, i)



polyurethane, and j) unknown in olive ridley ( $\Delta$ ,  $n = 35$ ), green (X,  $n = 9$ ), and loggerhead (O,  $n = 4$ ) sea turtles captured at different hook depths (m).

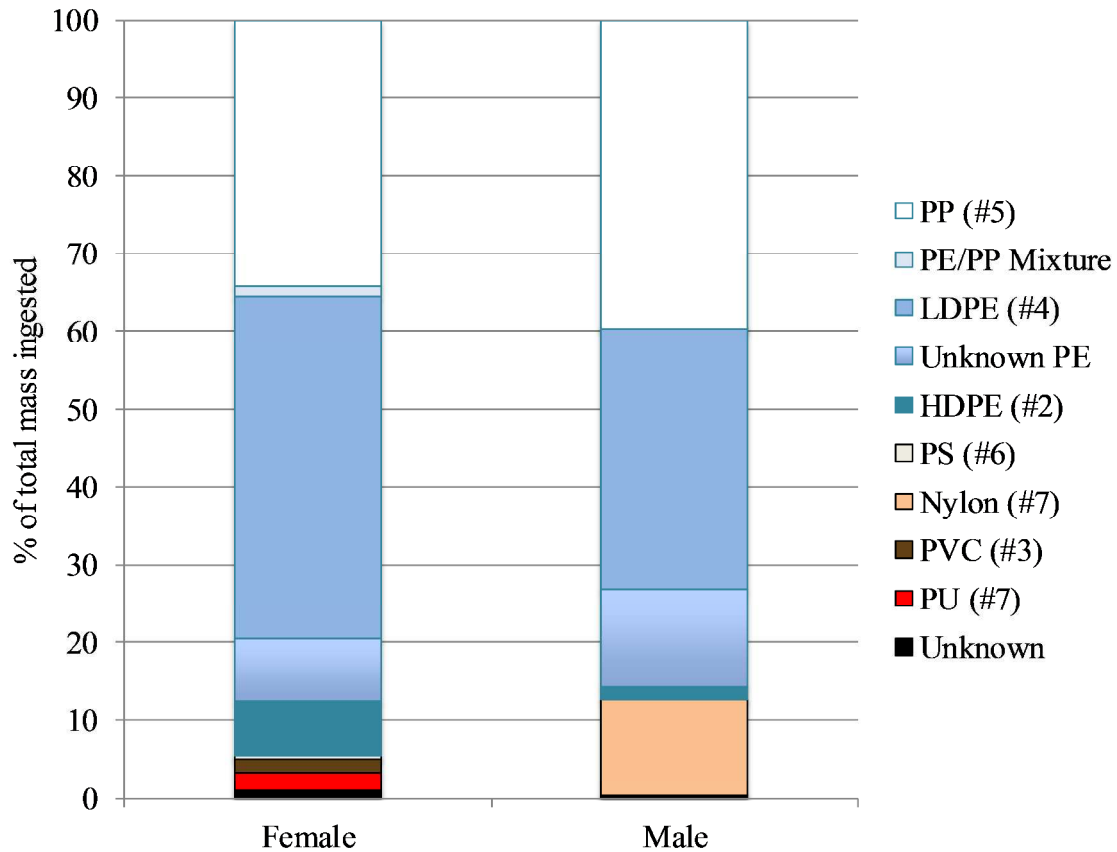

Figure S5. Average percent mass of ingested polymers by female ( $n = 30$ ) and male ( $n = 7$ ) olive ridley sea turtles. Based solely on chemical density, polymers that would float in seawater are bordered in blue, those that would sink in black. No significant difference was observed with MRPP ( $p = 0.571$ ). Error bars are not shown. Polypropylene (PP), PE/PP mixture, low-density polyethylene (LDPE), unknown polyethylene (unknown PE), high-density polyethylene (HDPE), polystyrene (PS), nylon, polyvinyl chloride (PVC), polyurethane (PU), and unknown plastic pieces.

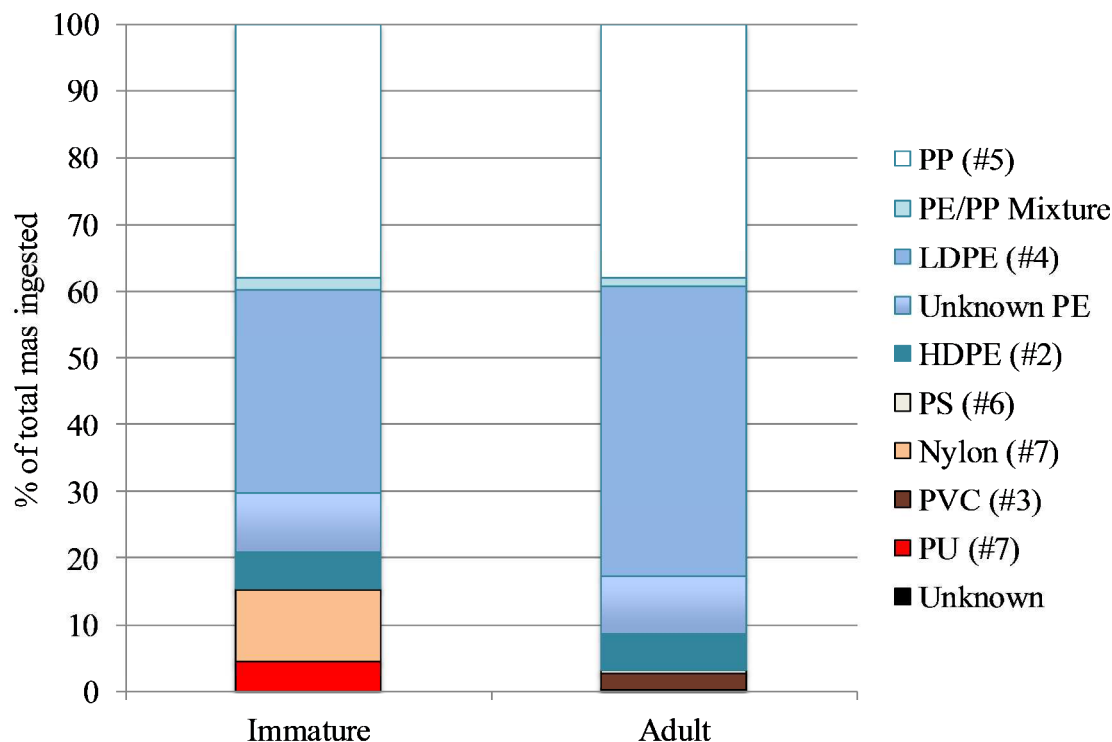

Figure S6. Average percent mass of ingested polymers by immature ( $n = 8$ ) and adult ( $n = 22$ ) olive ridley sea turtles. Based solely on chemical density, polymers that would float in seawater are bordered in blue, those that would sink in black. No significant difference was observed with MRPP ( $p = 0.479$ ). Error bars are not shown. Polypropylene (PP), PE/PP mixture, low-density polyethylene (LDPE), unknown polyethylene (unknown PE), high-density polyethylene (HDPE), polystyrene (PS), nylon, polyvinyl chloride (PVC), polyurethane (PU), and unknown plastic pieces.

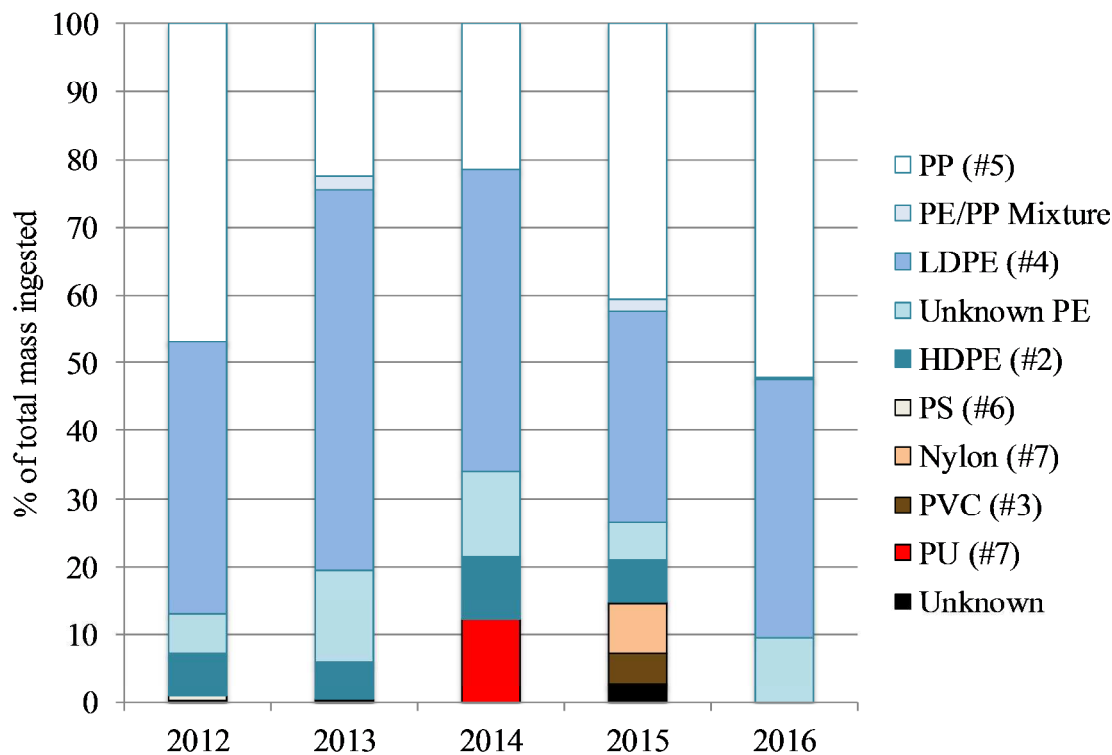

Figure S7. Average percent mass of ingested polymers by olive ridley sea turtles caught in 2012 (n = 7), 2013 (n = 10), 2014 (n = 5), 2015 (n = 11), and 2016 (n = 4). Based solely on chemical density, polymers that would float in seawater are bordered in blue, those that would sink in black. No significant difference was observed with MRPP ( $p = 0.463$ ). Error bars are not shown. Polypropylene (PP), PE/PP mixture, low-density polyethylene (LDPE), unknown polyethylene (unknown PE), high-density polyethylene (HDPE), polystyrene (PS), nylon, polyvinyl chloride (PVC), polyurethane (PU), and unknown plastic pieces.

A.

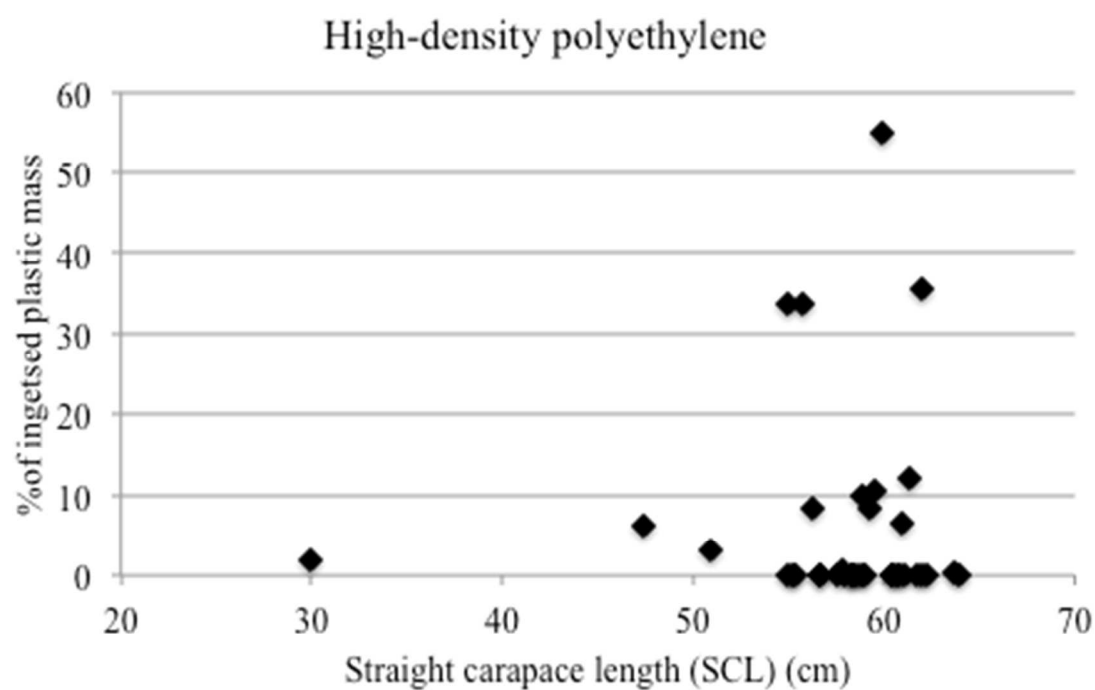

B.

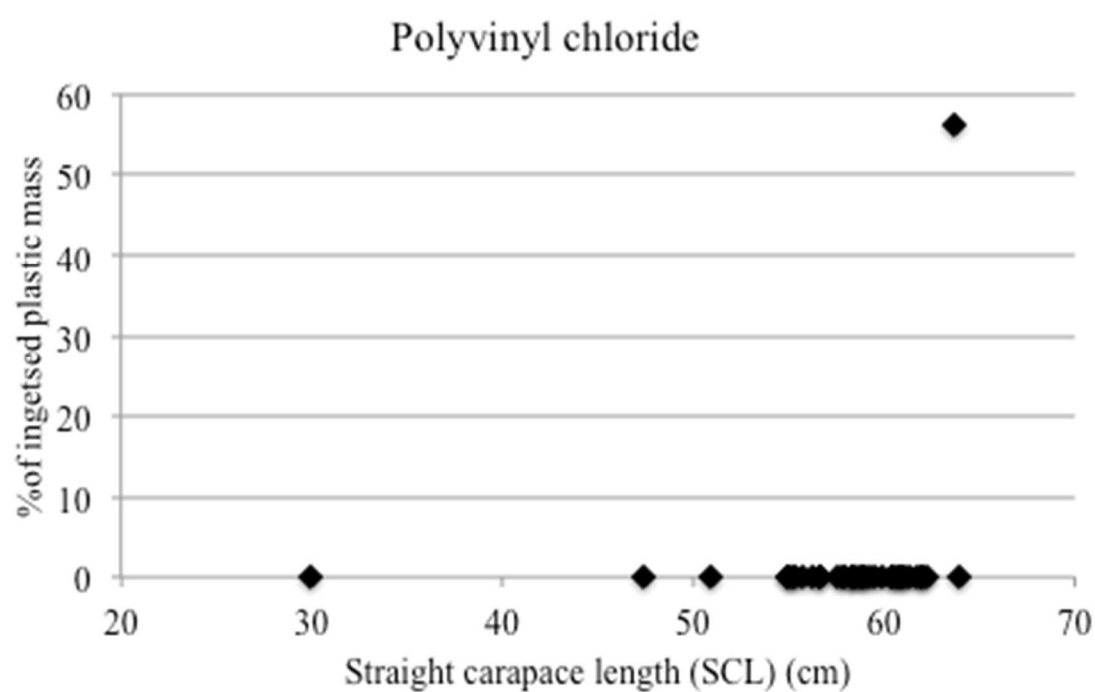

C.

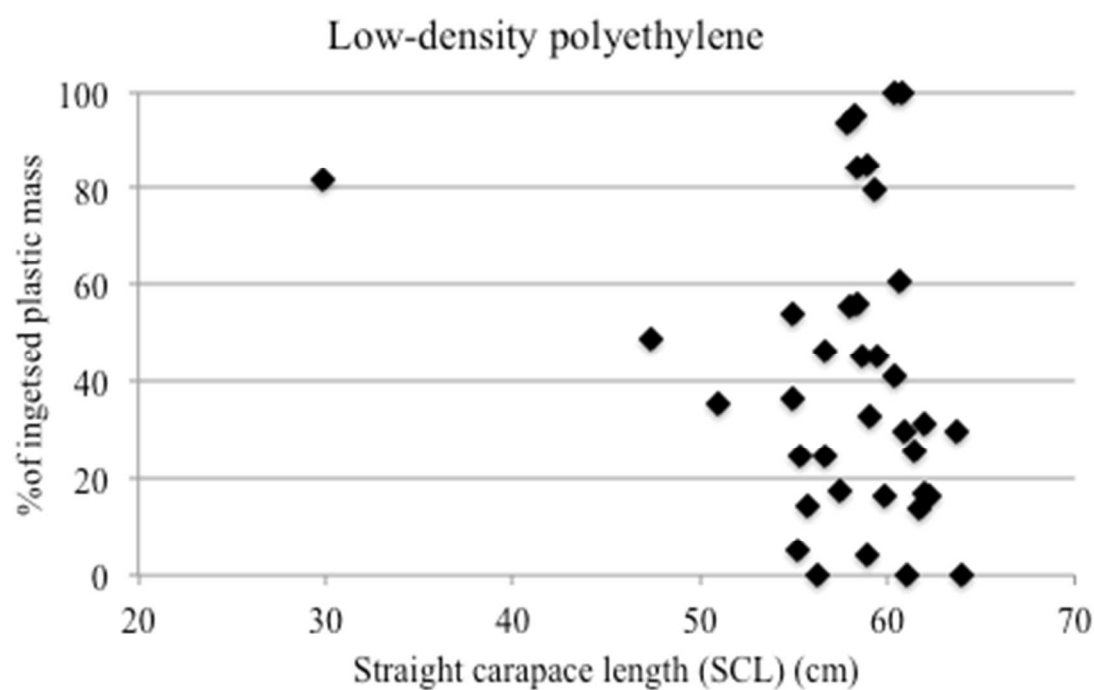

D.

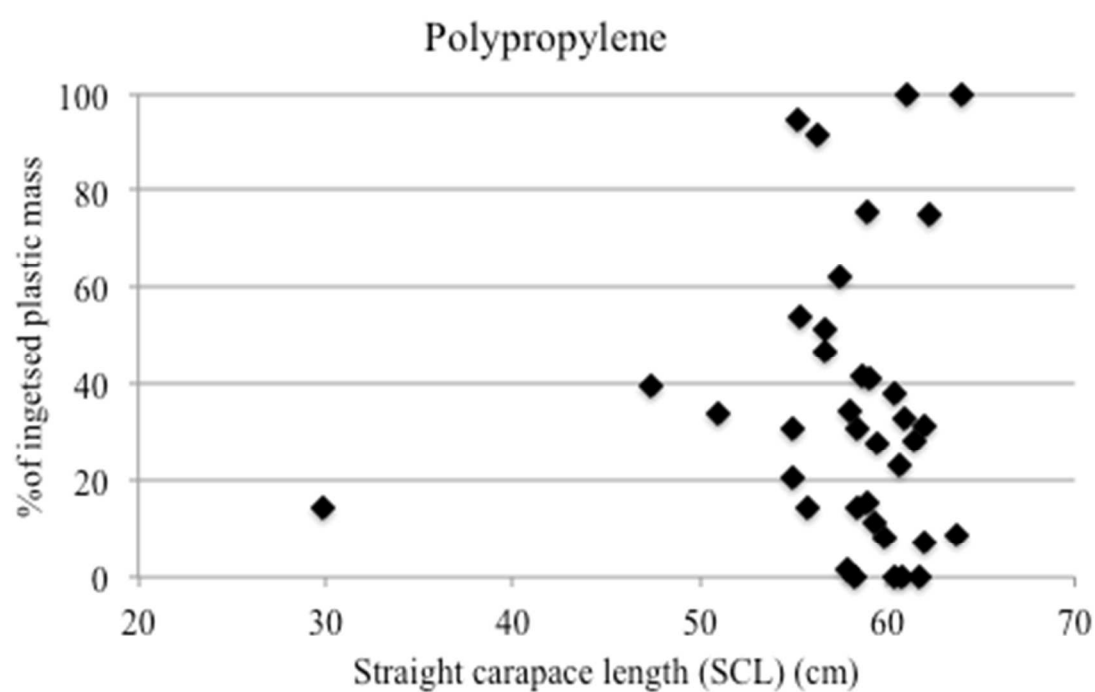

E.

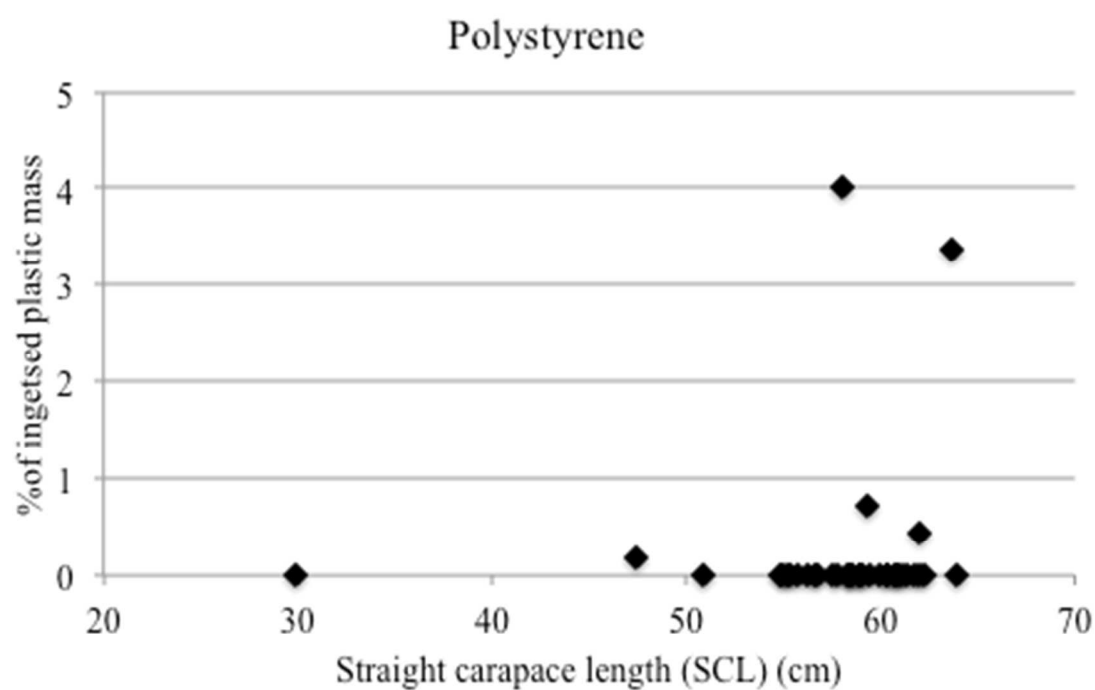

F.

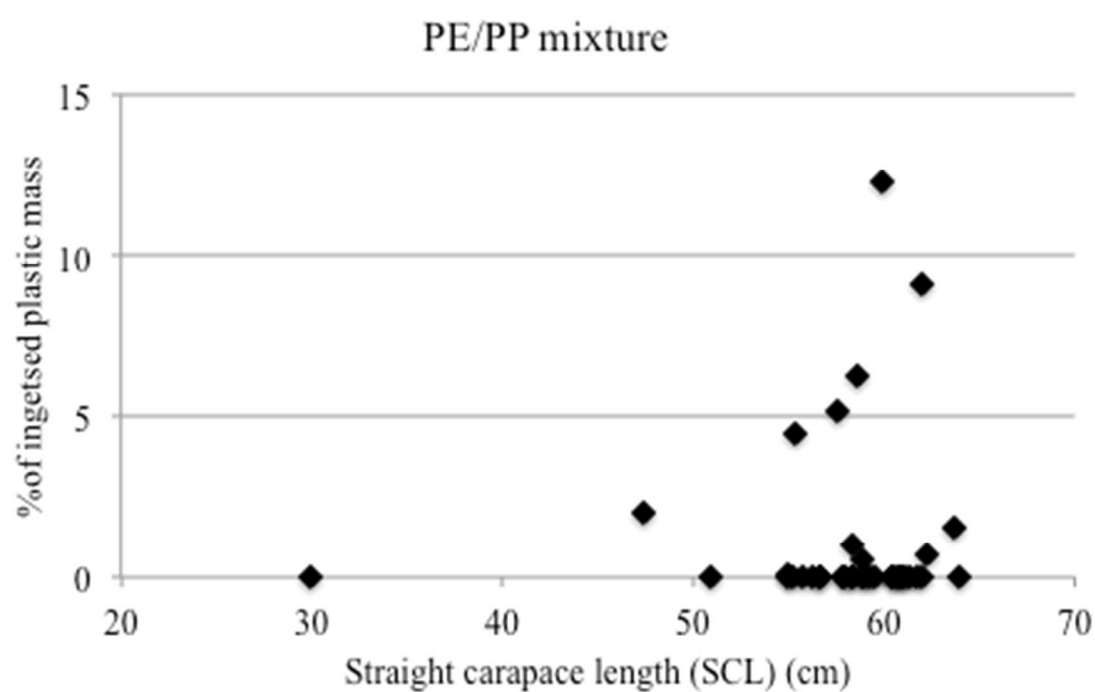



I.

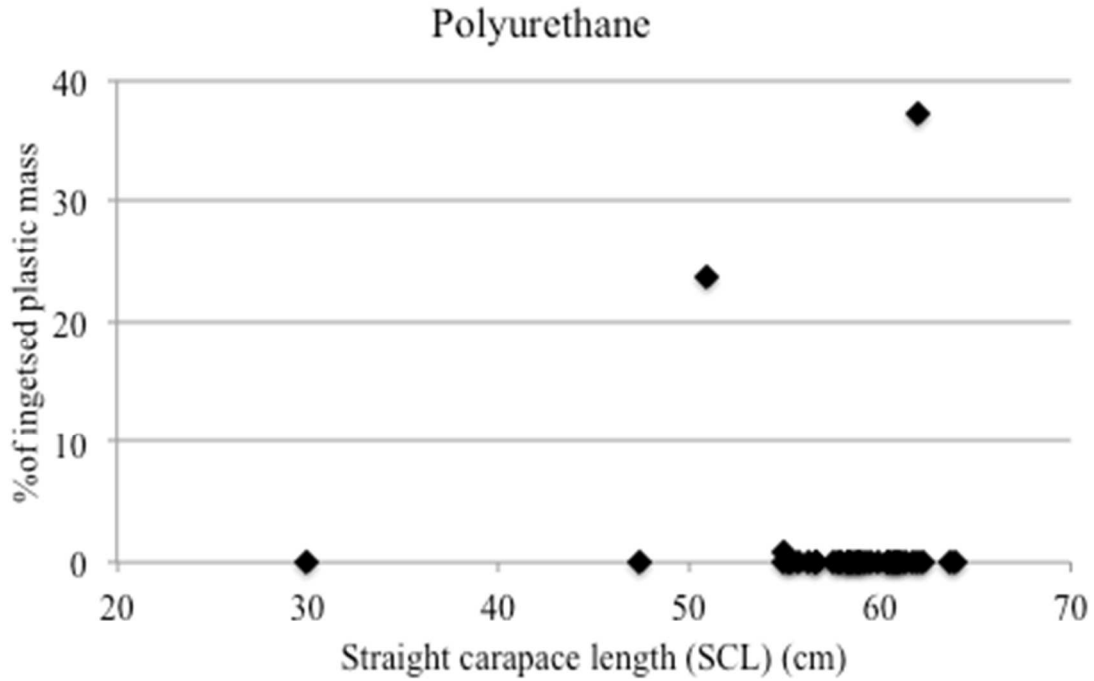

J.

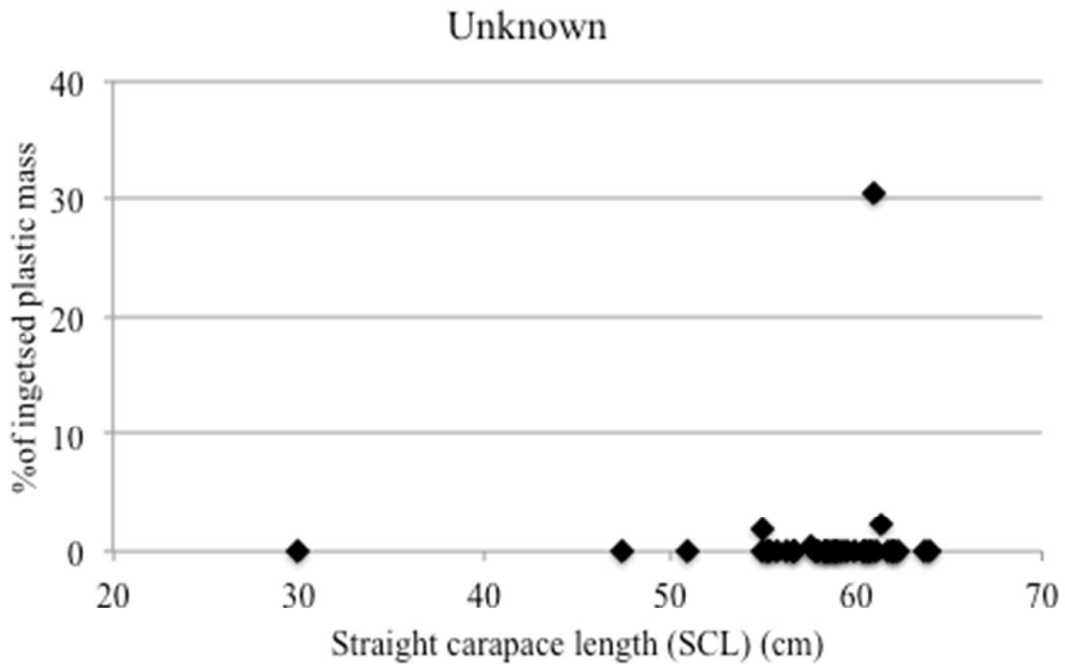

Figure S8. Percent of ingested plastic mass of a) high-density polyethylene (HDPE), b) polyvinyl chloride (PVC), c) low-density polyethylene d) polypropylene (PP), e) polystyrene (PS), f) PE/PP mixture, g) unknown polyethylene (PE), h) nylon, i) polyurethane (PU), and j) unknown in olive ridley ( $n = 37$ ) sea turtles with varying straight carapace lengths (cm).



A.

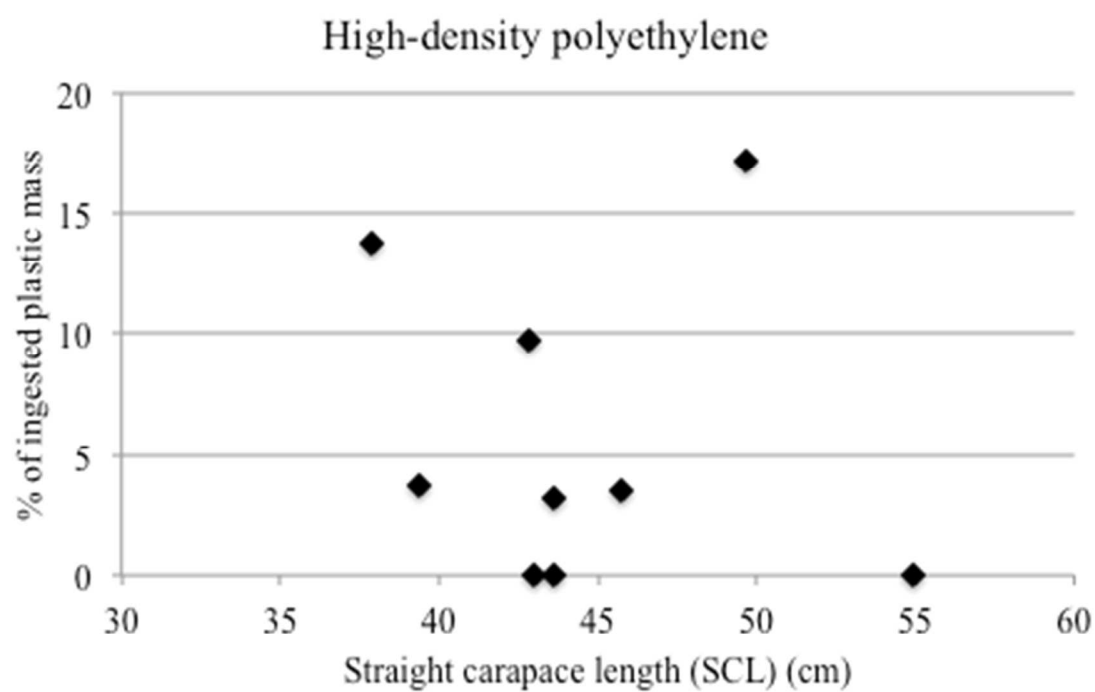

B.

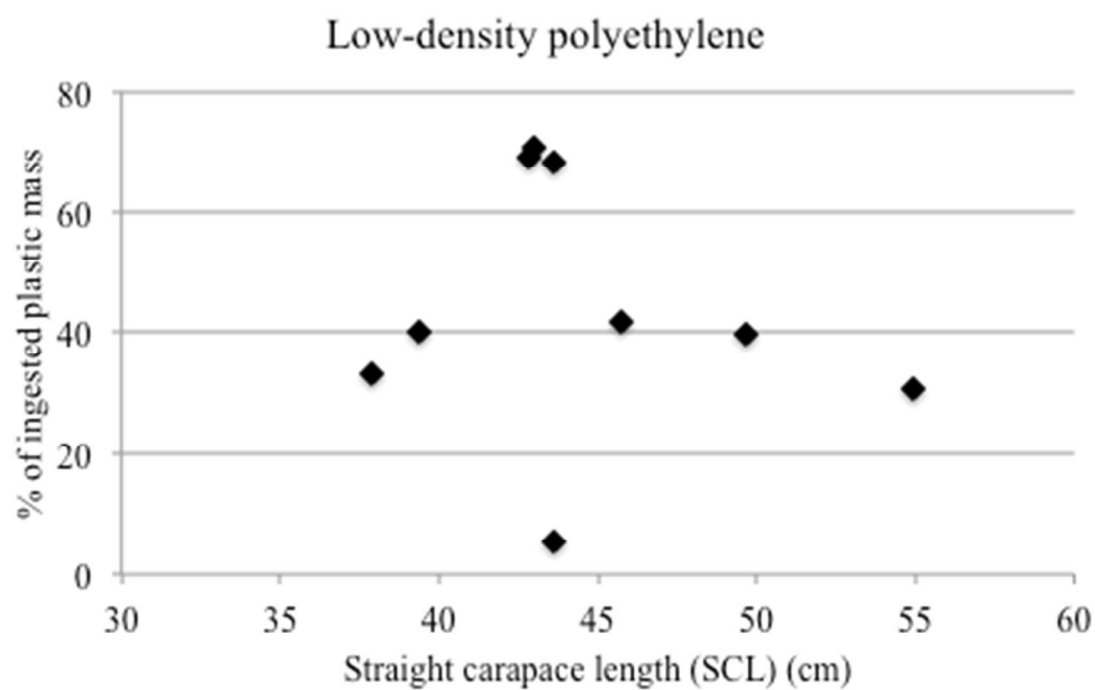

C.

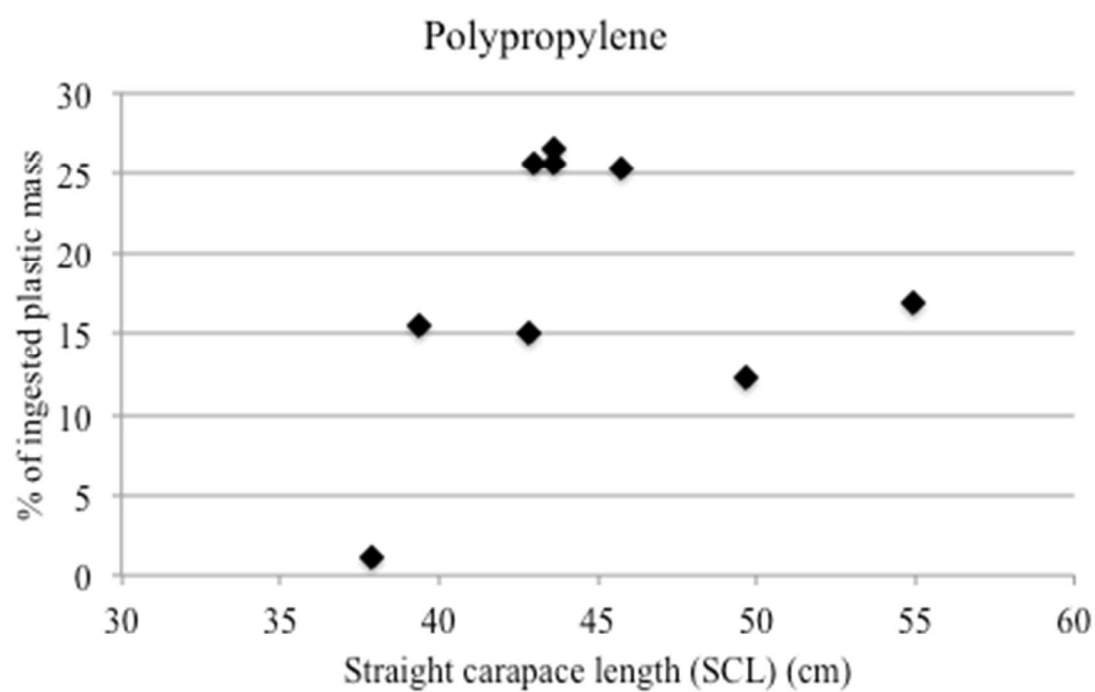

D.

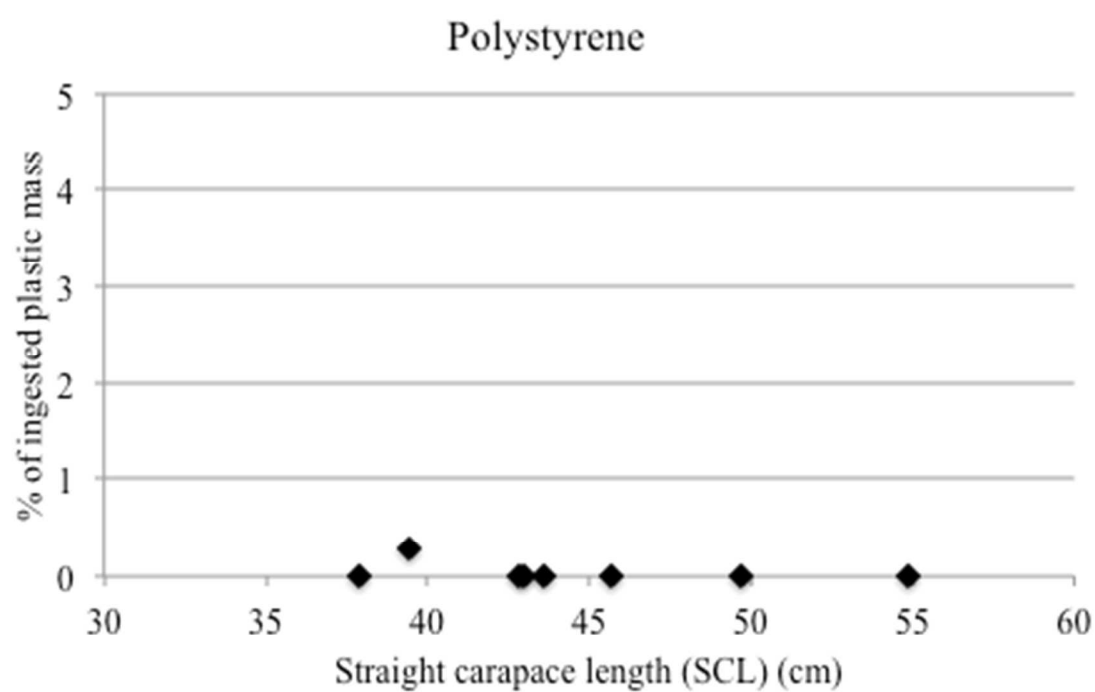

E.

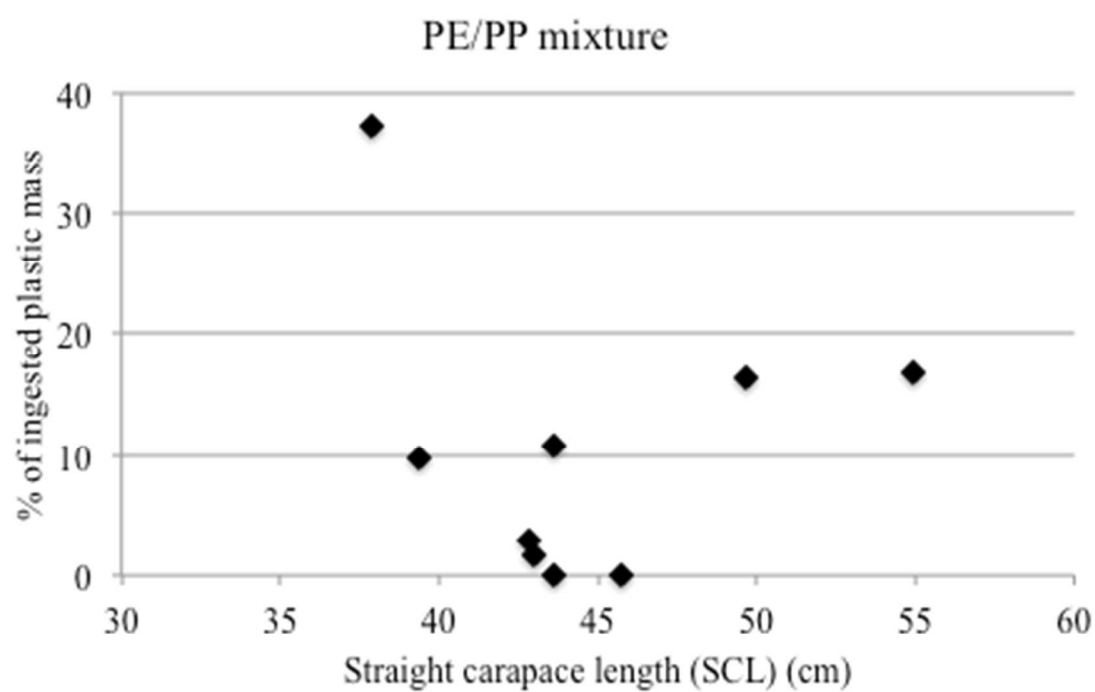

F.

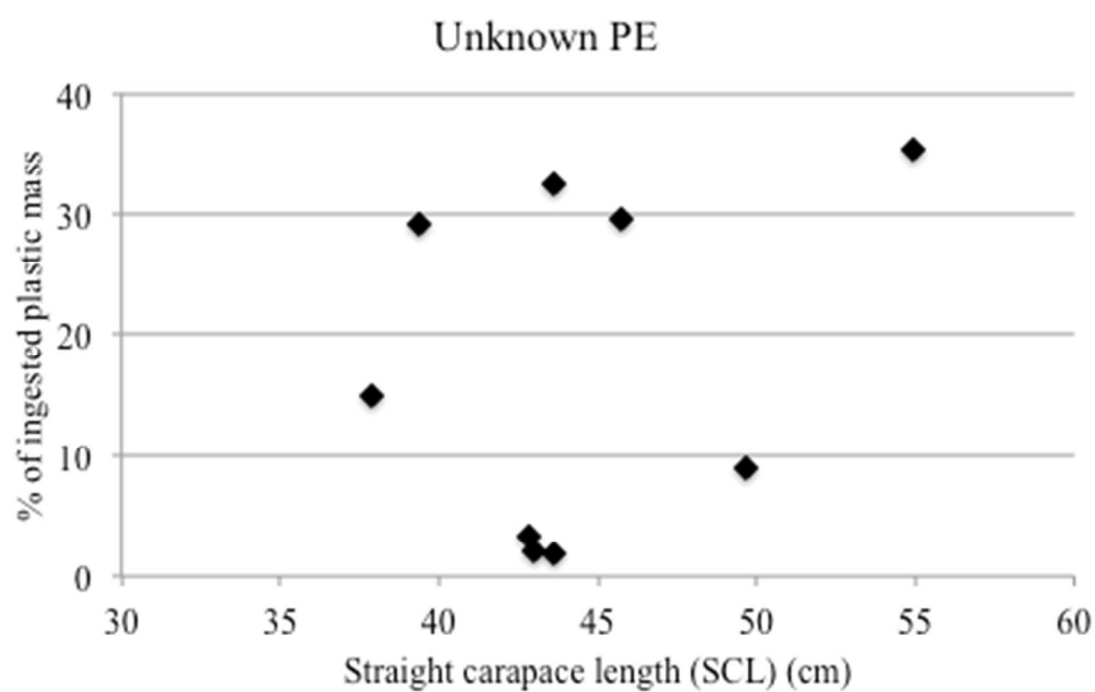

G.

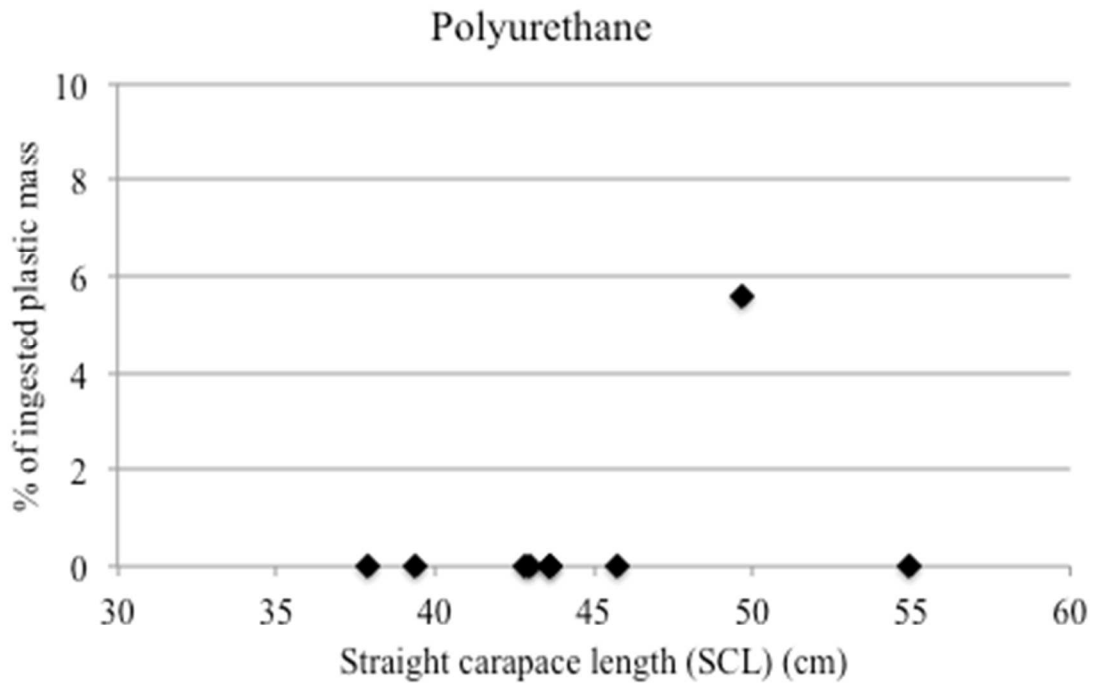

H.

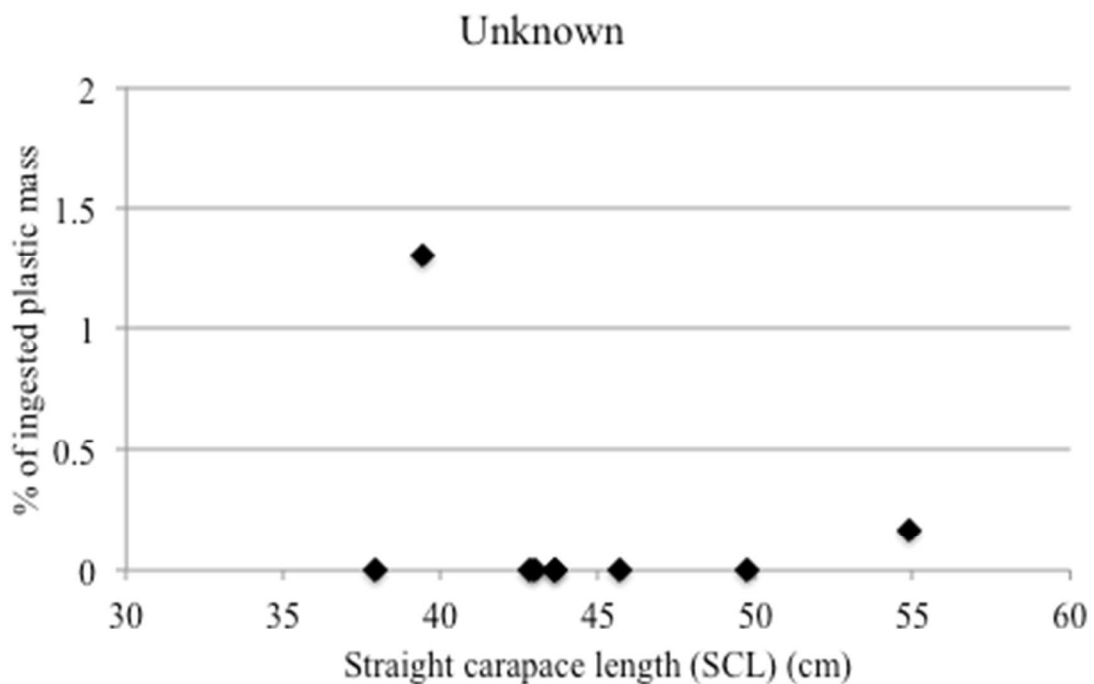

Figure S9. Percent of ingested plastic mass of a) high-density polyethylene (HDPE), b) low-density polyethylene c) polypropylene (PP), d) polystyrene (PS), e) PE/PP mixture, f) unknown polyethylene (PE), g) polyurethane (PU), and h) unknown in green (n = 9) sea turtles with varying straight carapace lengths (cm).

A.

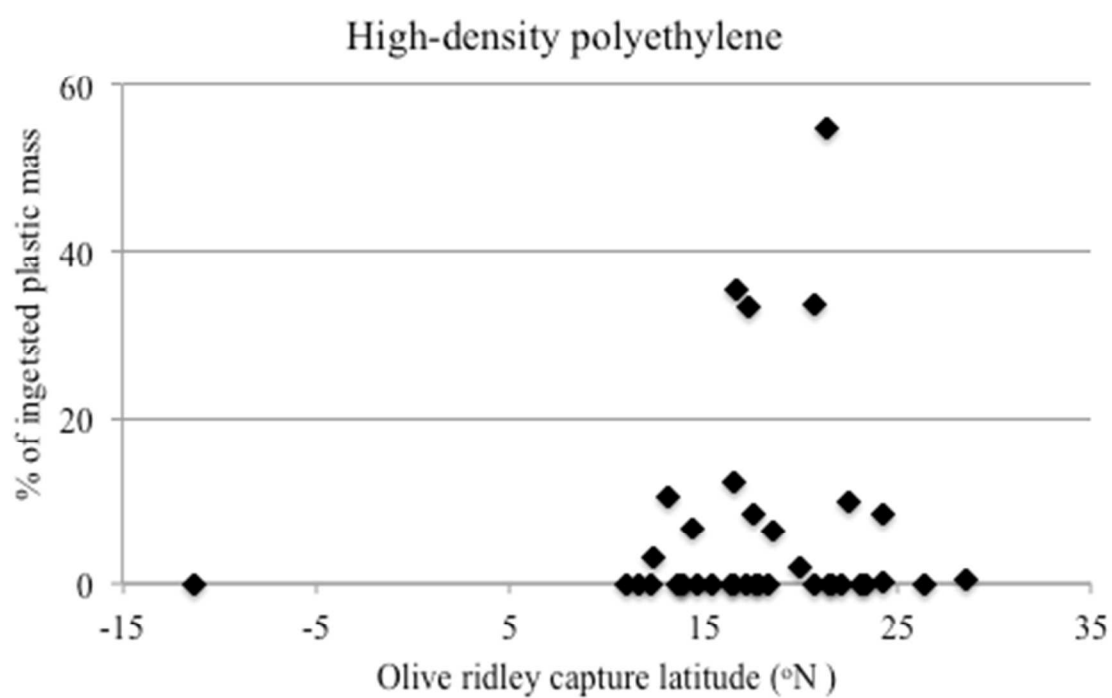

B.

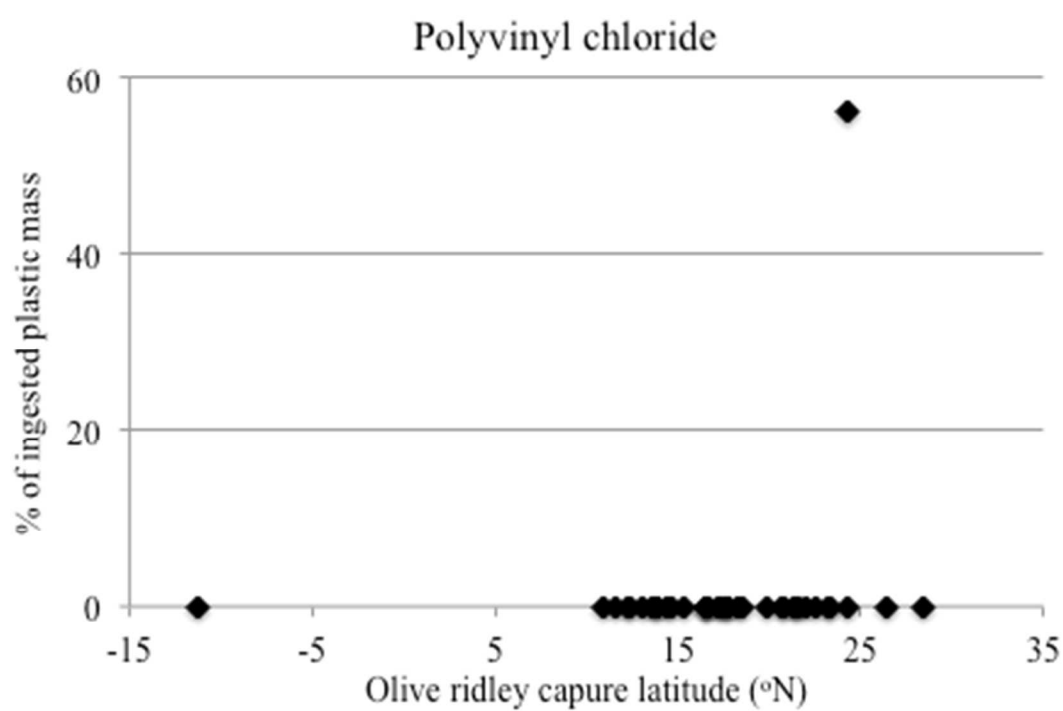

C.

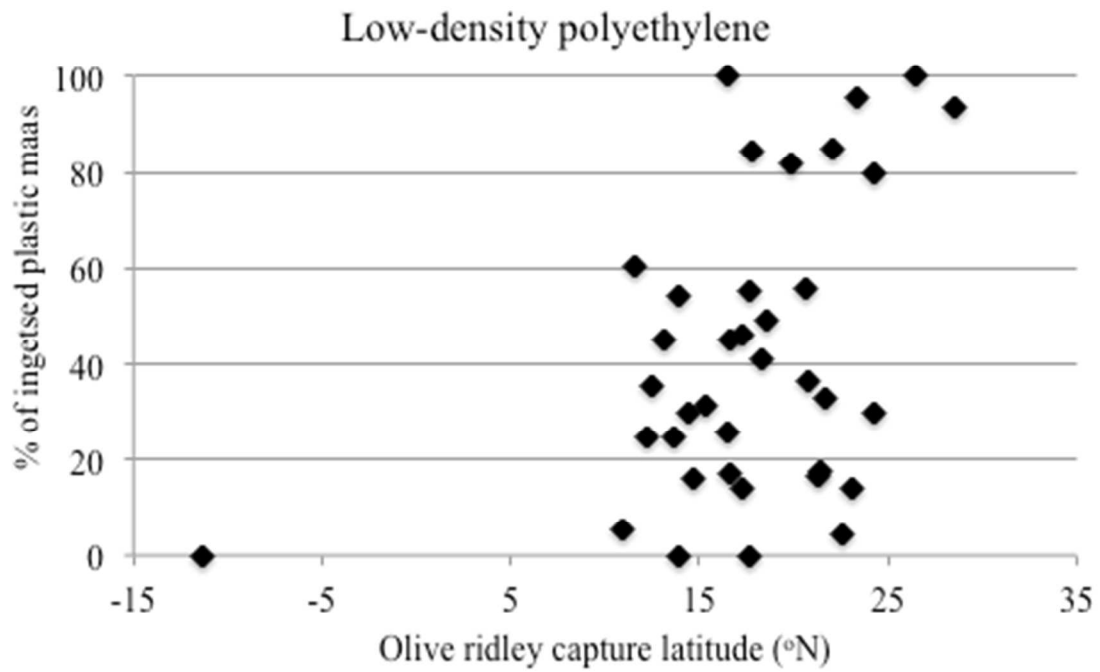

D.

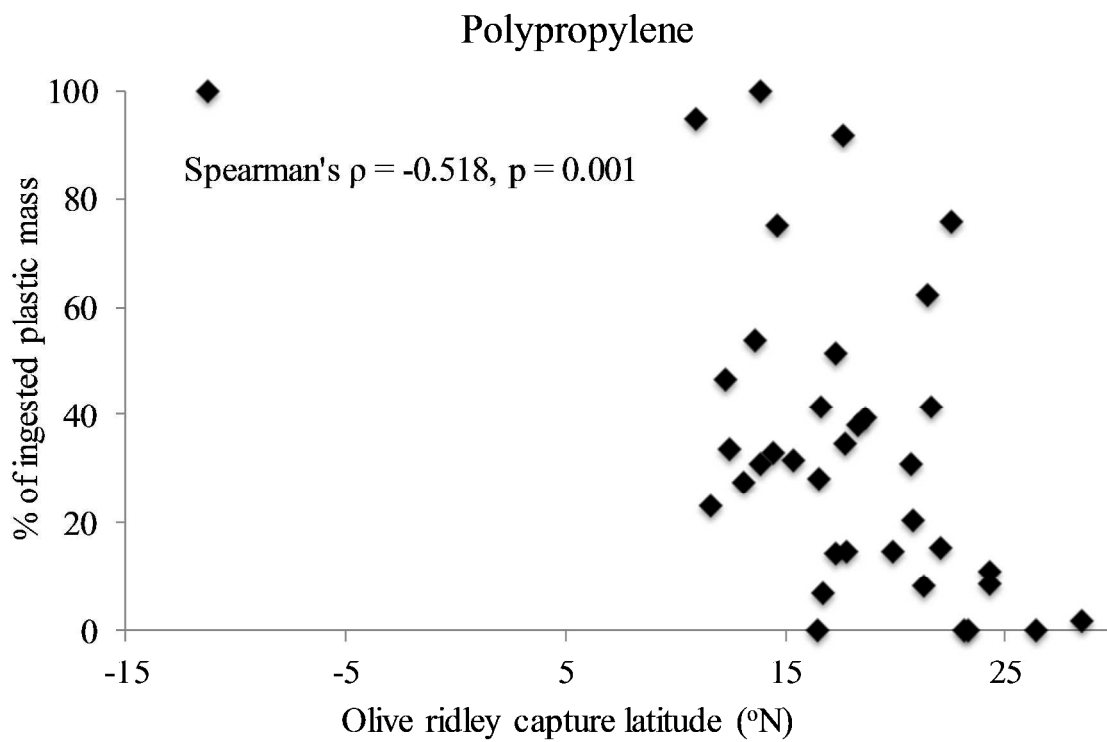

E.

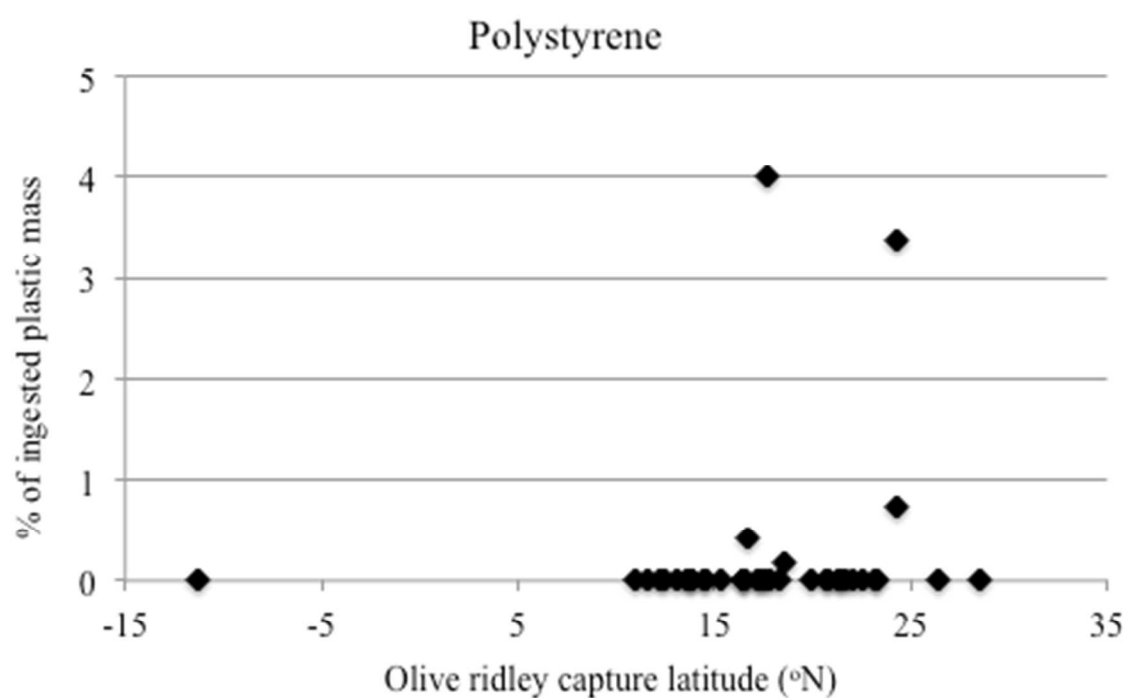

F.

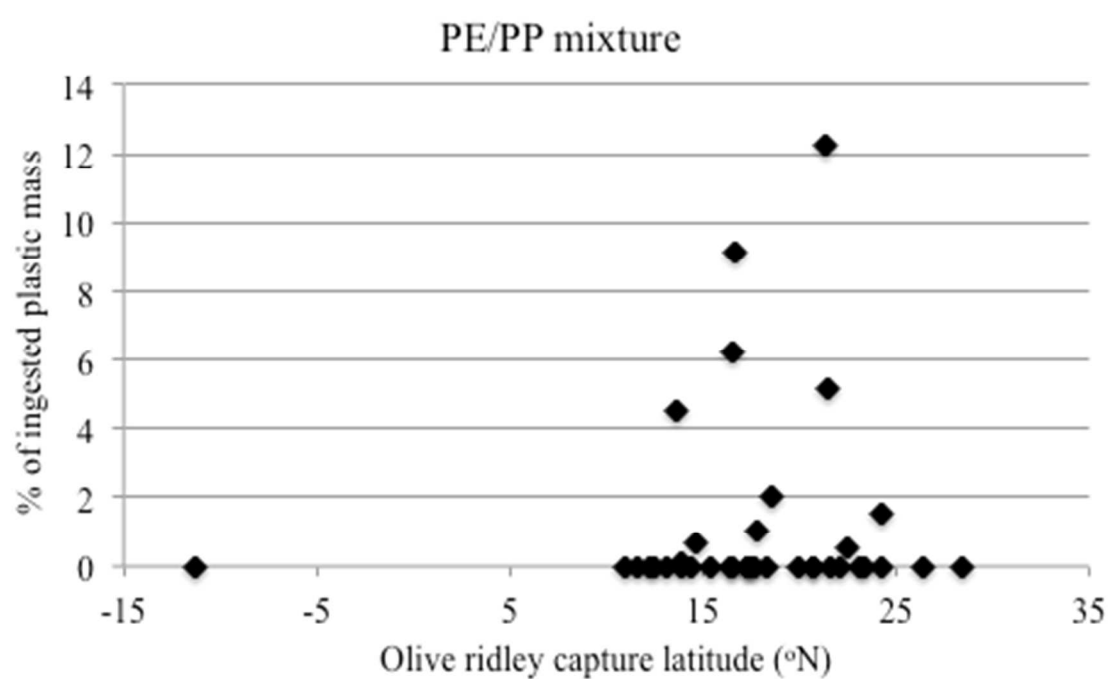

G.

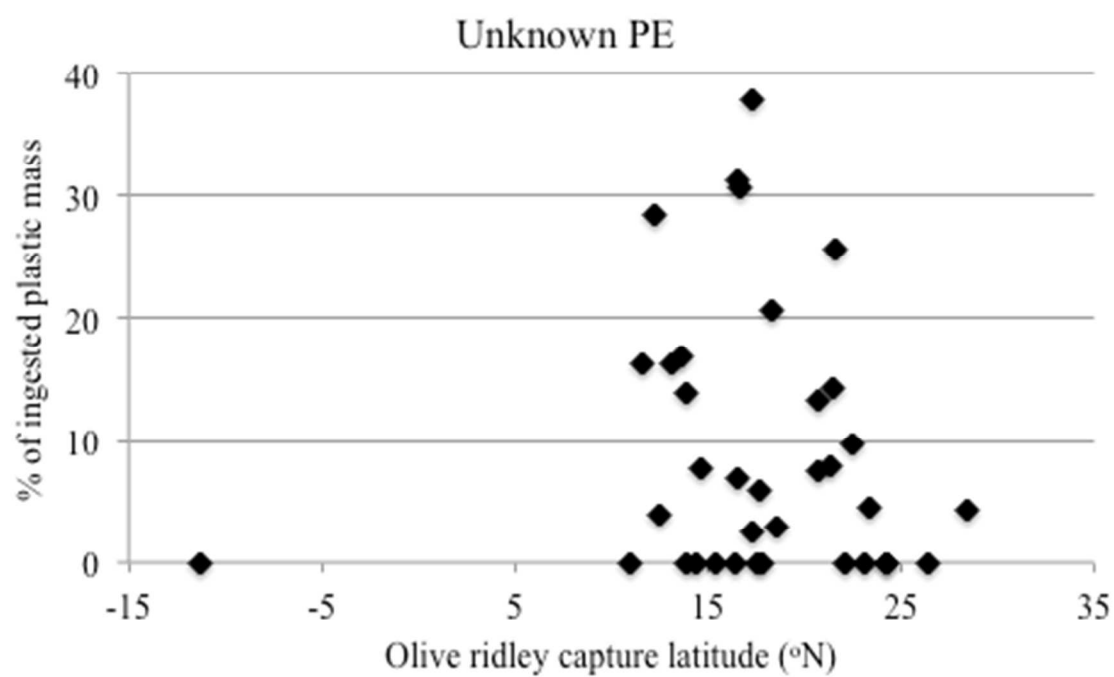

H.

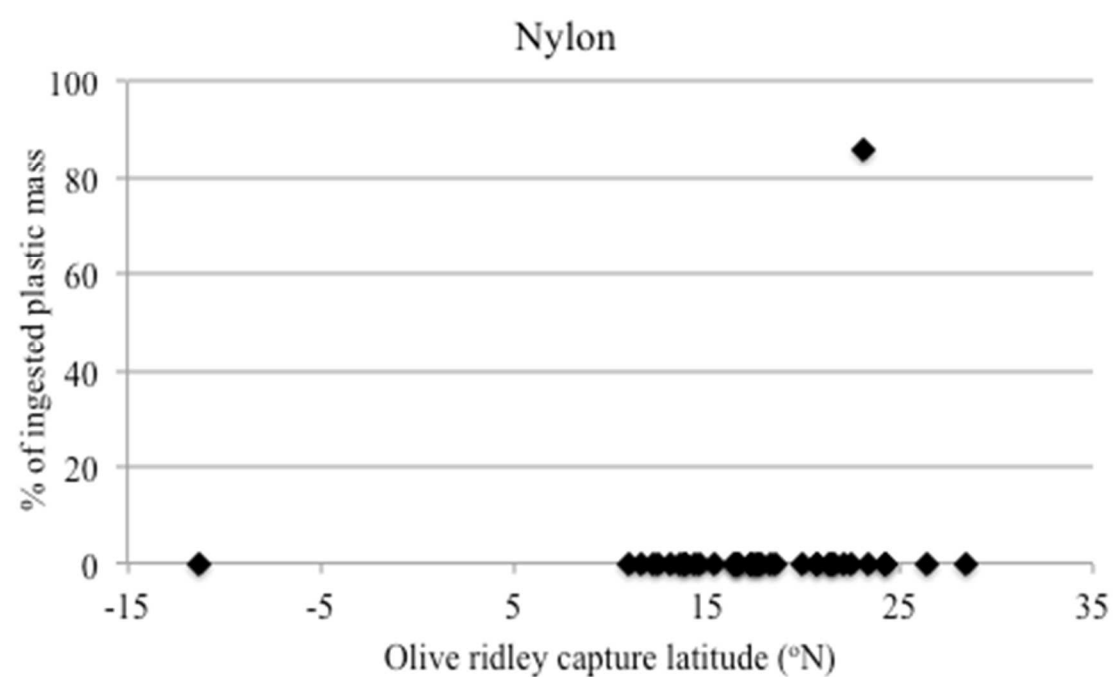



I.

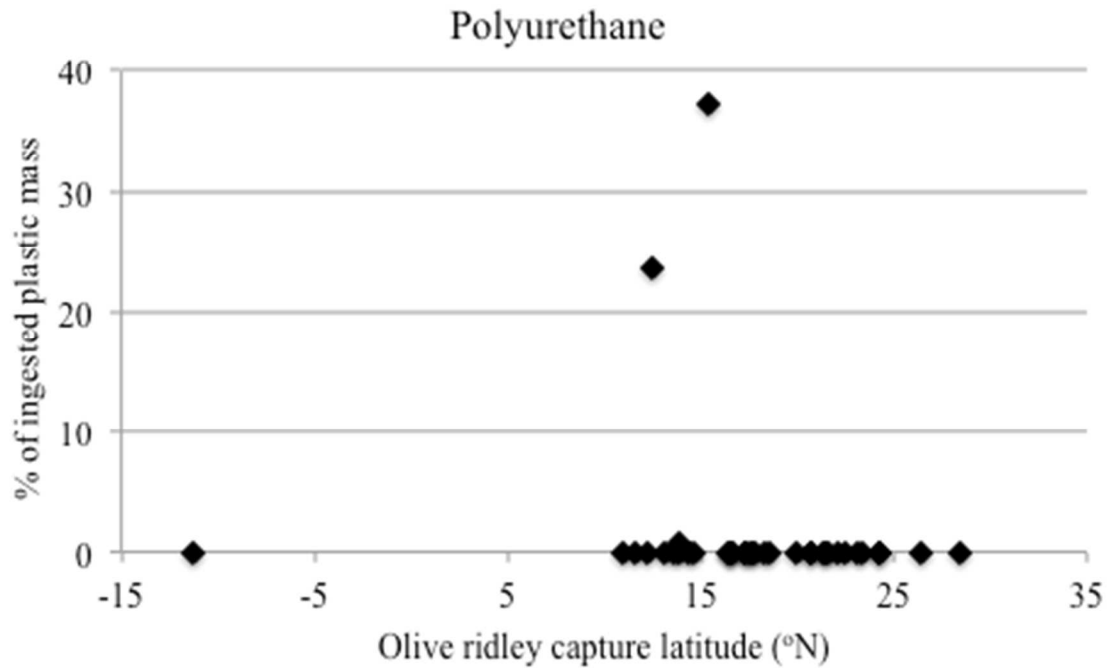

J.

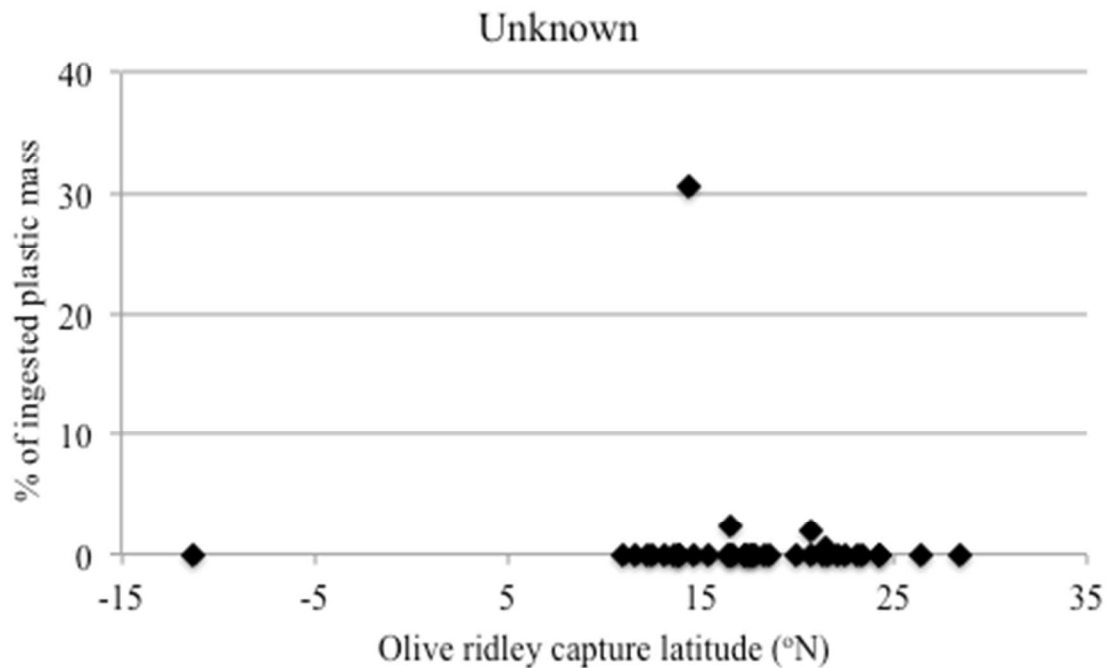

Figure S10. Percent of ingested plastic mass of a) high-density polyethylene (HDPE), b) polyvinyl chloride (PVC), c) low-density polyethylene, d) polypropylene (PP) e) polystyrene (PS), f) PE/PP mixture, g) unknown polyethylene (PE), h) nylon, i)

polyurethane (PU), and j) unknown in olive ridley ( $n = 37$ ) sea turtles with varying capture latitudes ( $^{\circ}\text{N}$ ).

A.

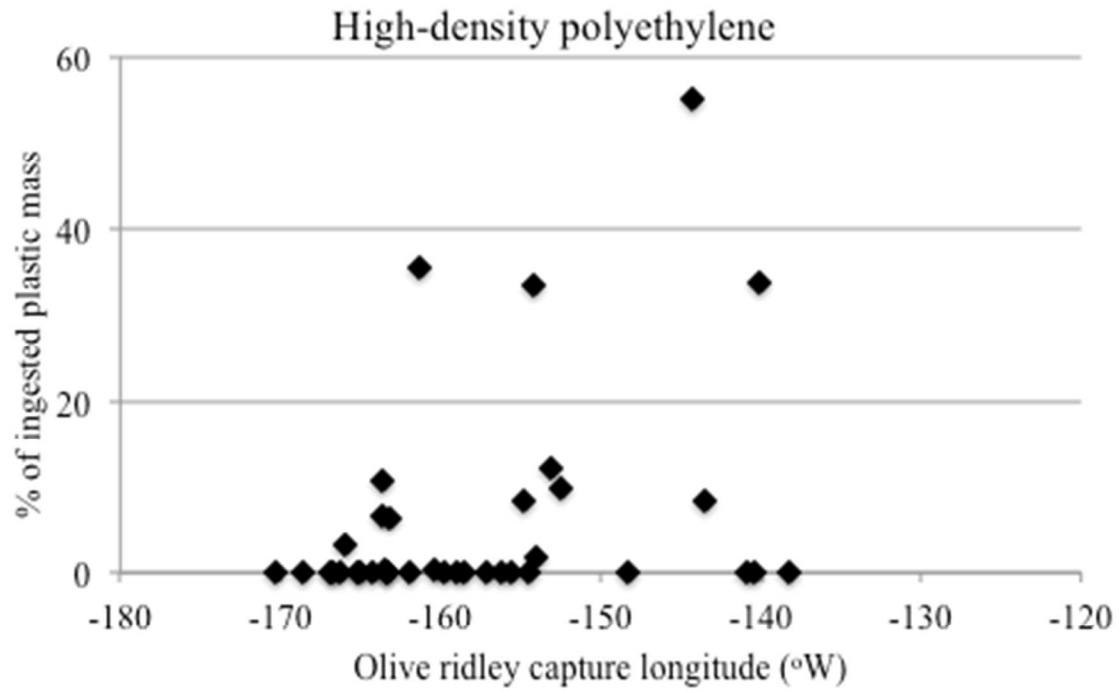

B.

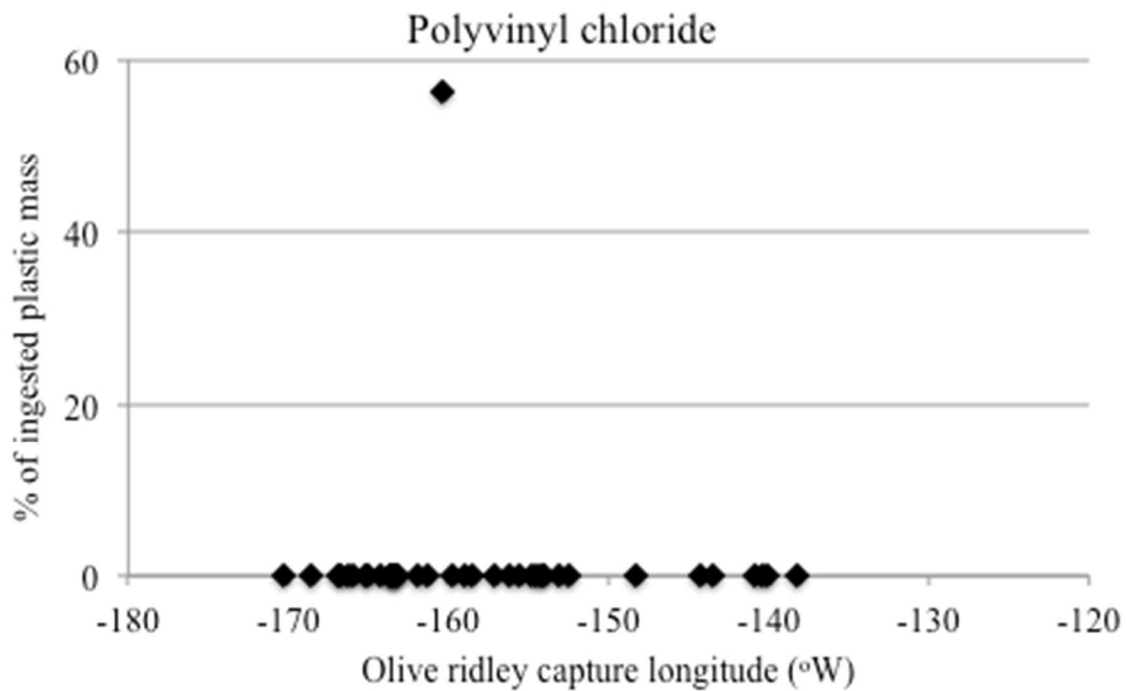

C.

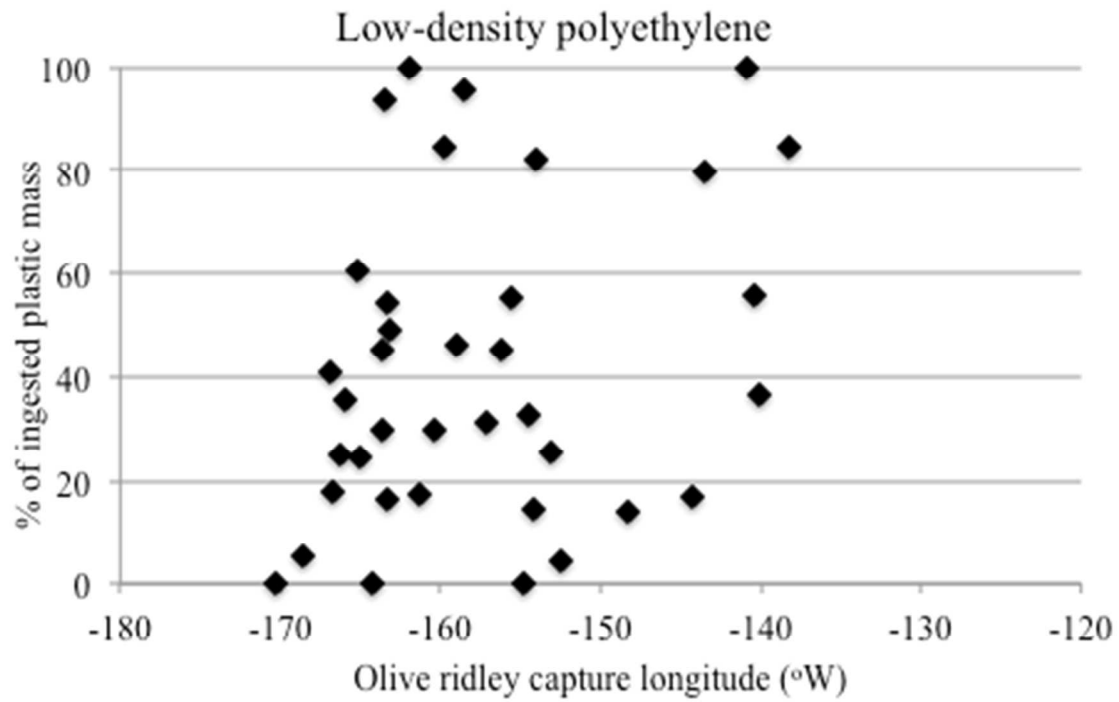

D.

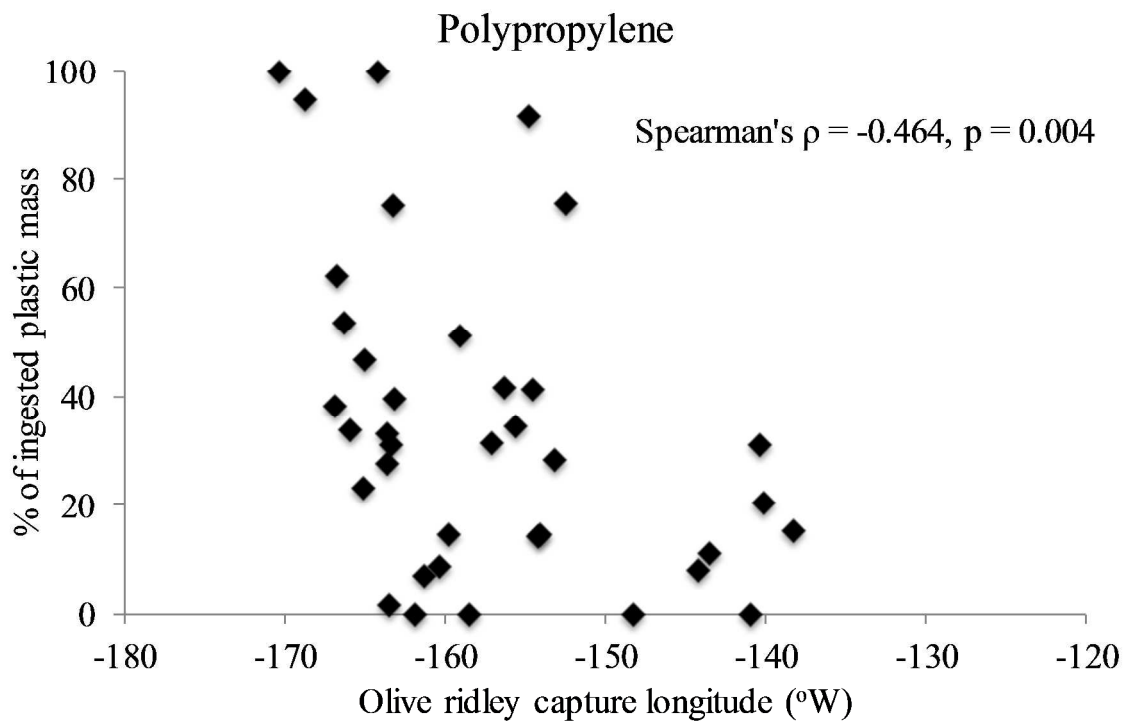

E.

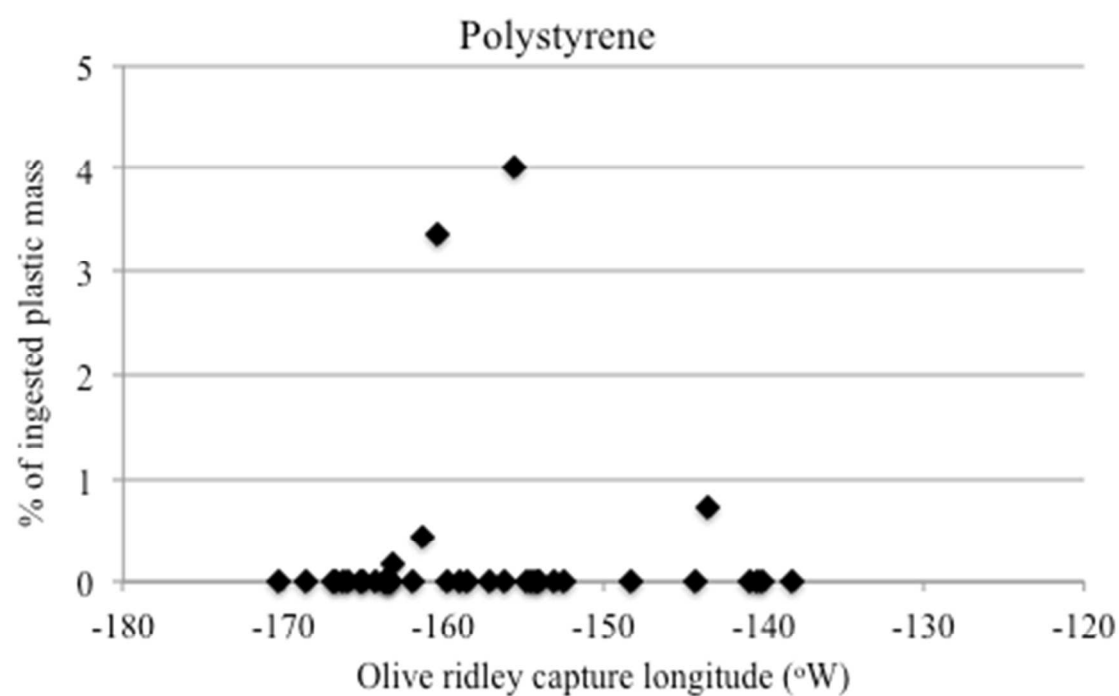

F.

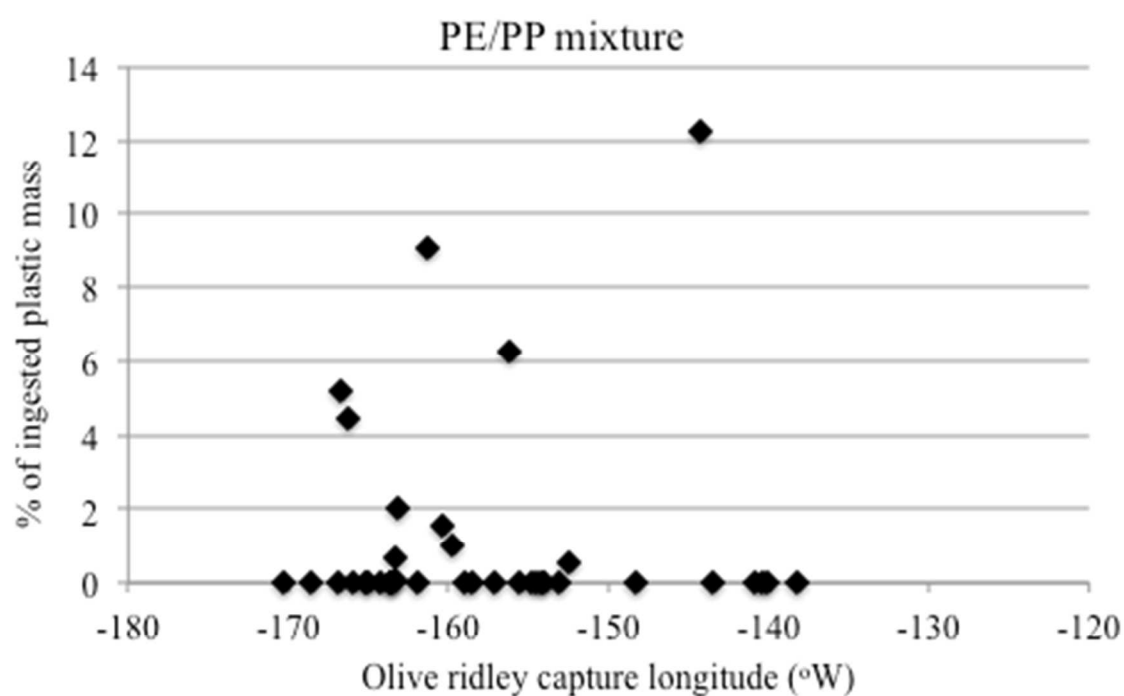

G.

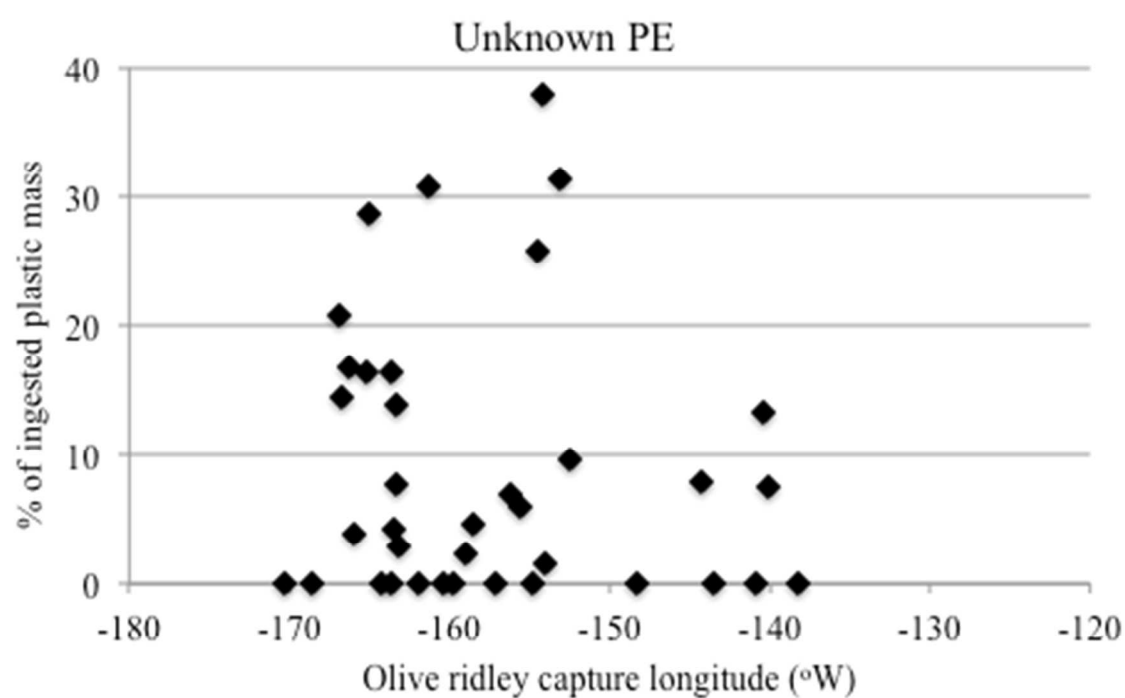

H.

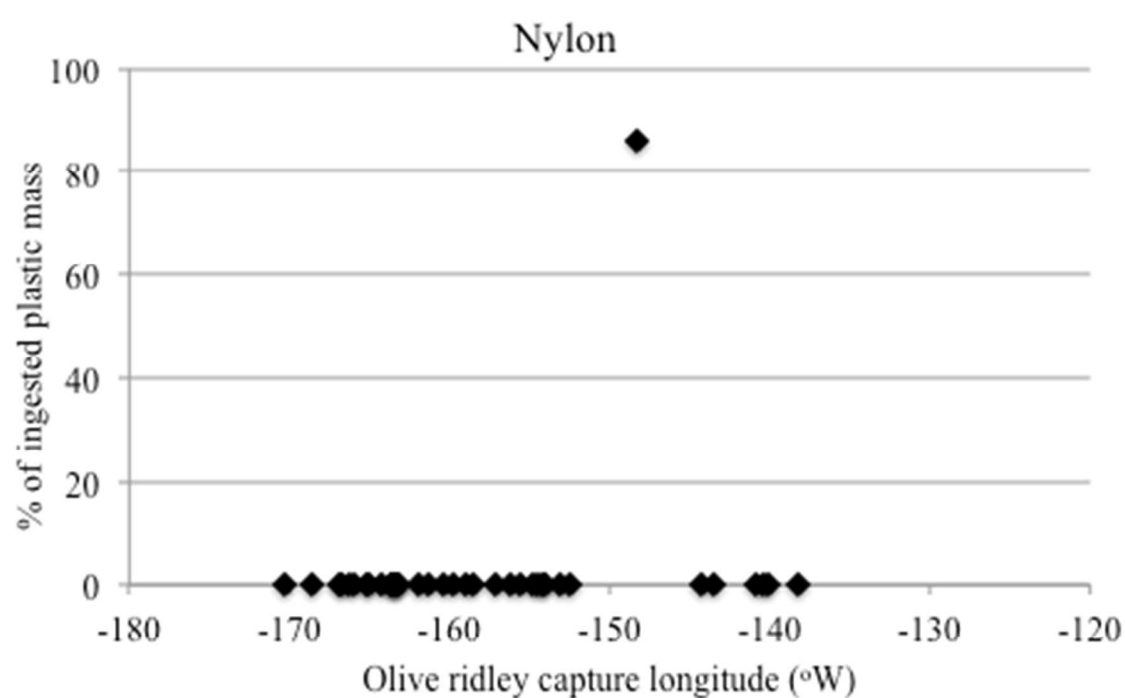

I.

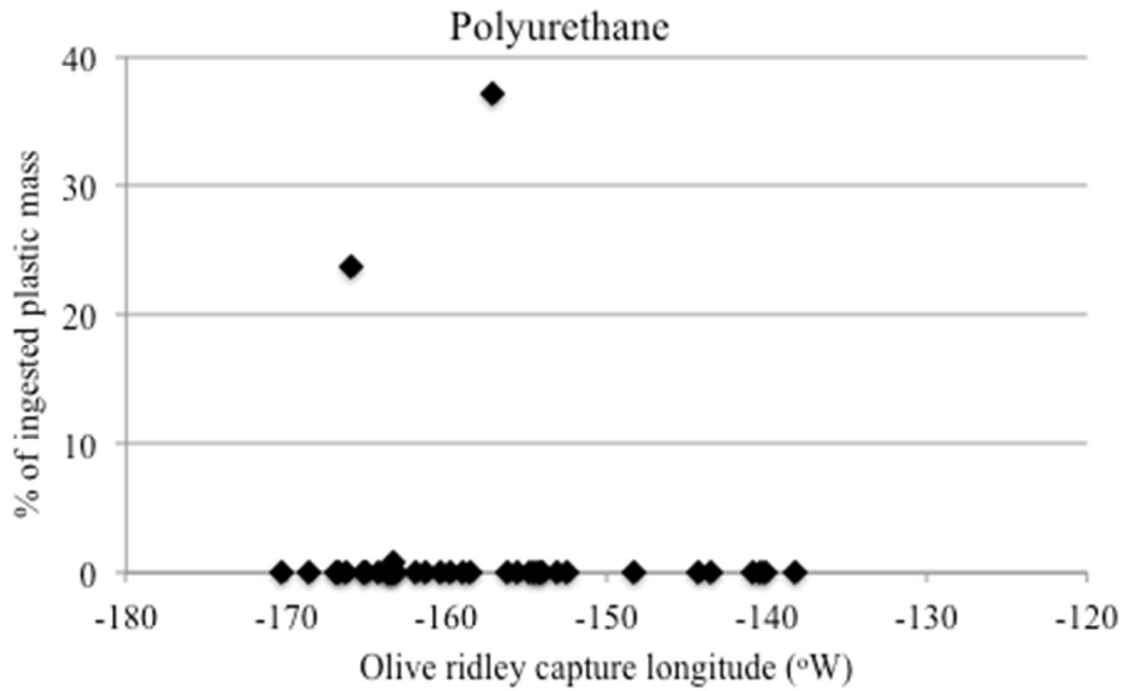

J.

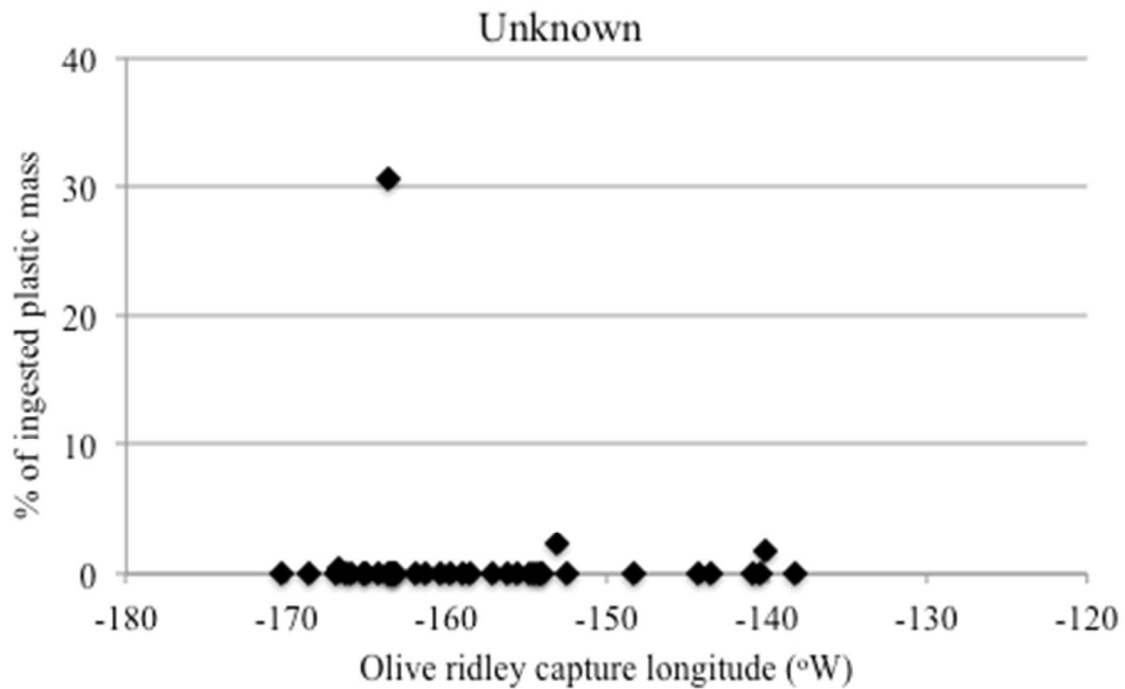

Figure S11. Percent of ingested plastic mass of a) high-density polyethylene (HDPE), b) polyvinyl chloride (PVC), c) low-density polyethylene, d) polypropylene (PP), e) polystyrene (PS), f) PE/PP mixture, g) unknown polyethylene (PE), h) nylon, i)

polyurethane (PU), and j) unknown in olive ridley ( $n = 37$ ) sea turtles with varying capture longitudes ( $^{\circ}\text{W}$ ).

A.

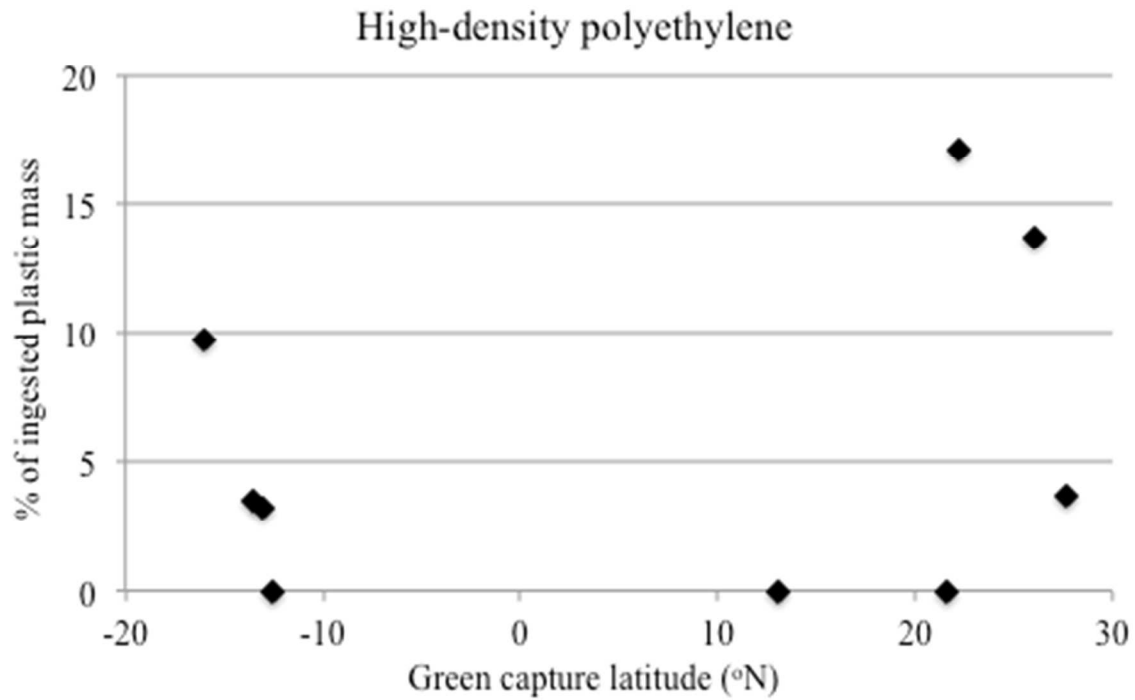

B.

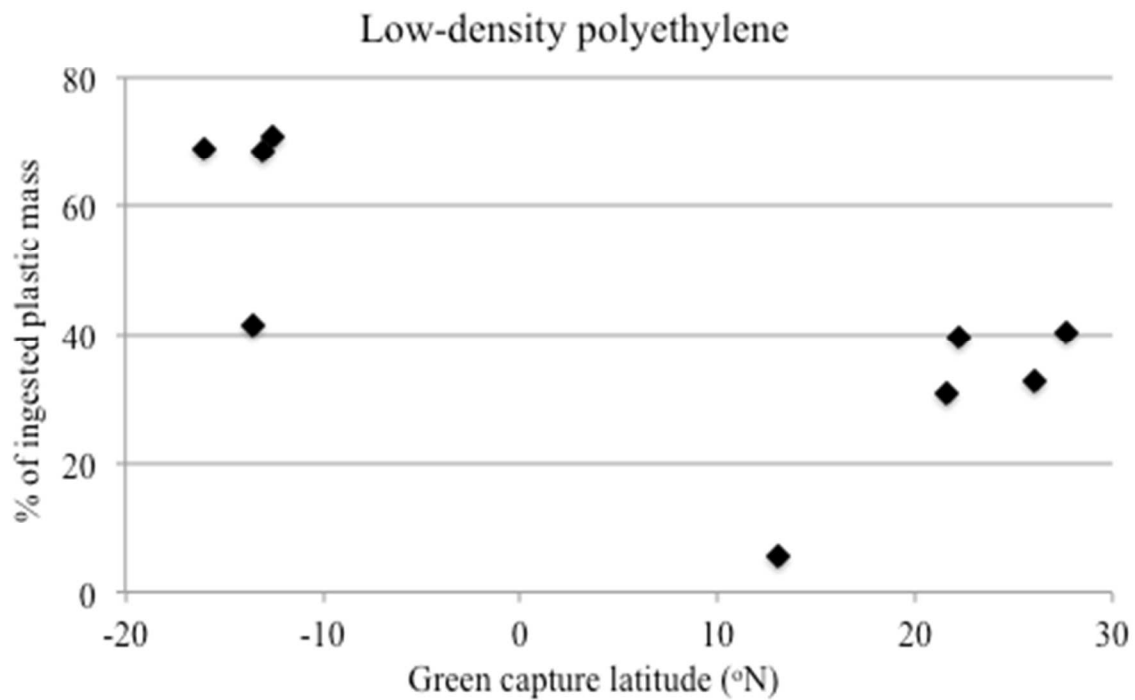

C.

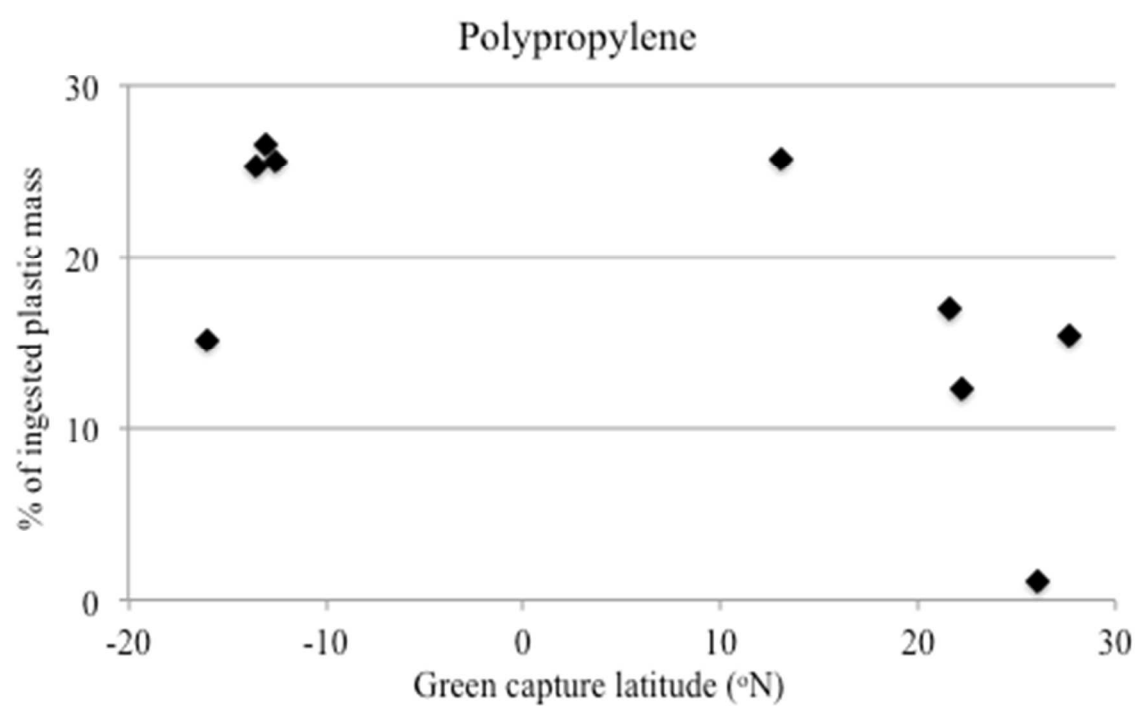

D.

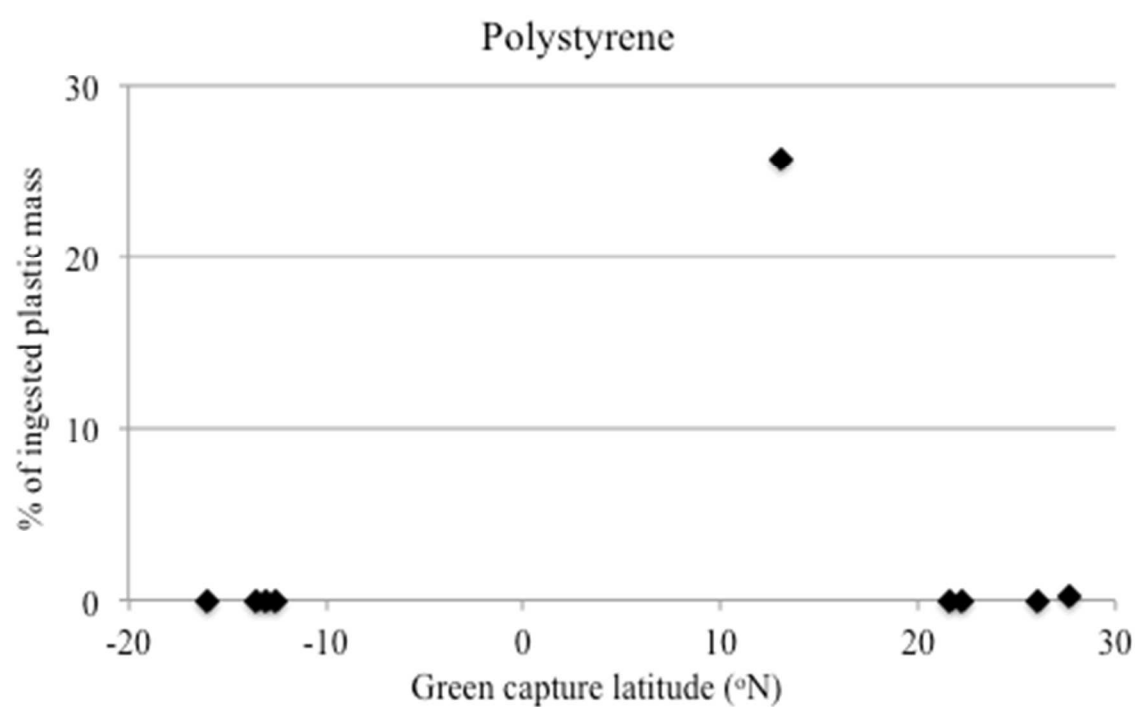



E.

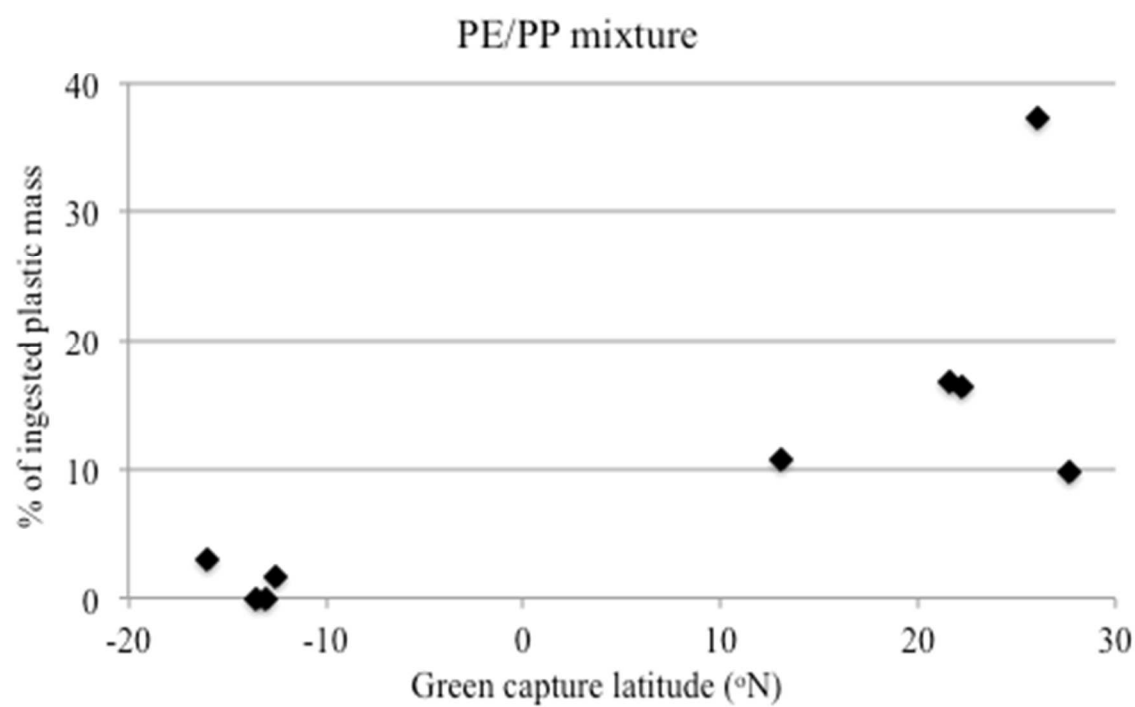

F.

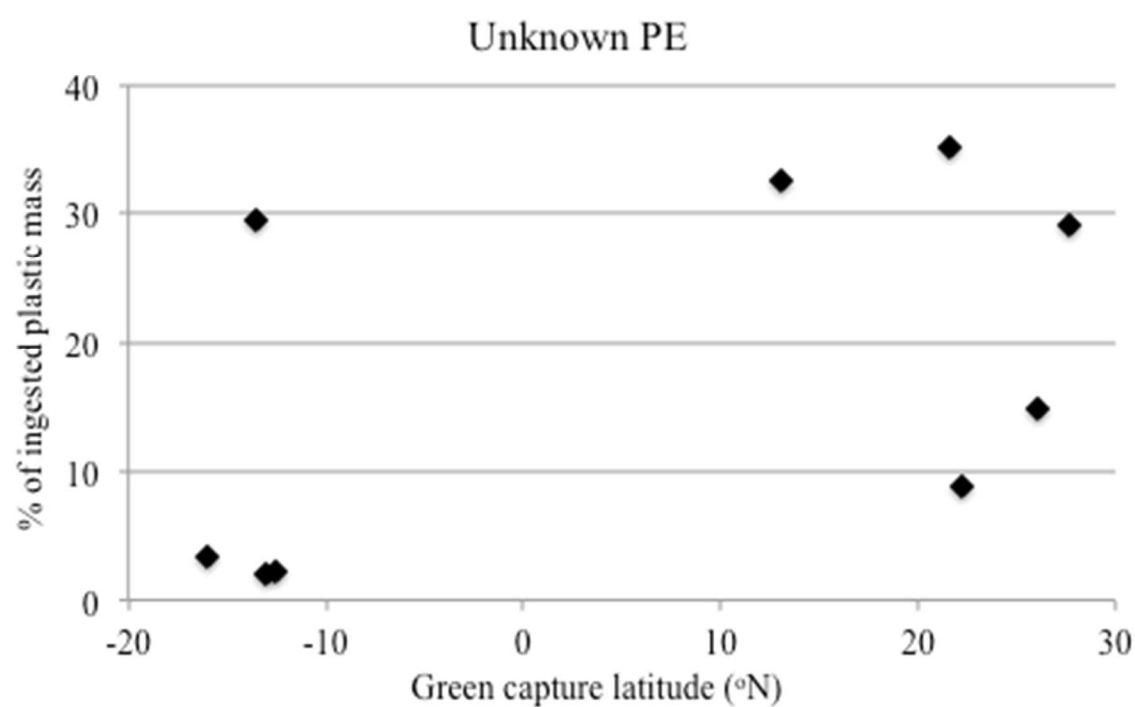

G.

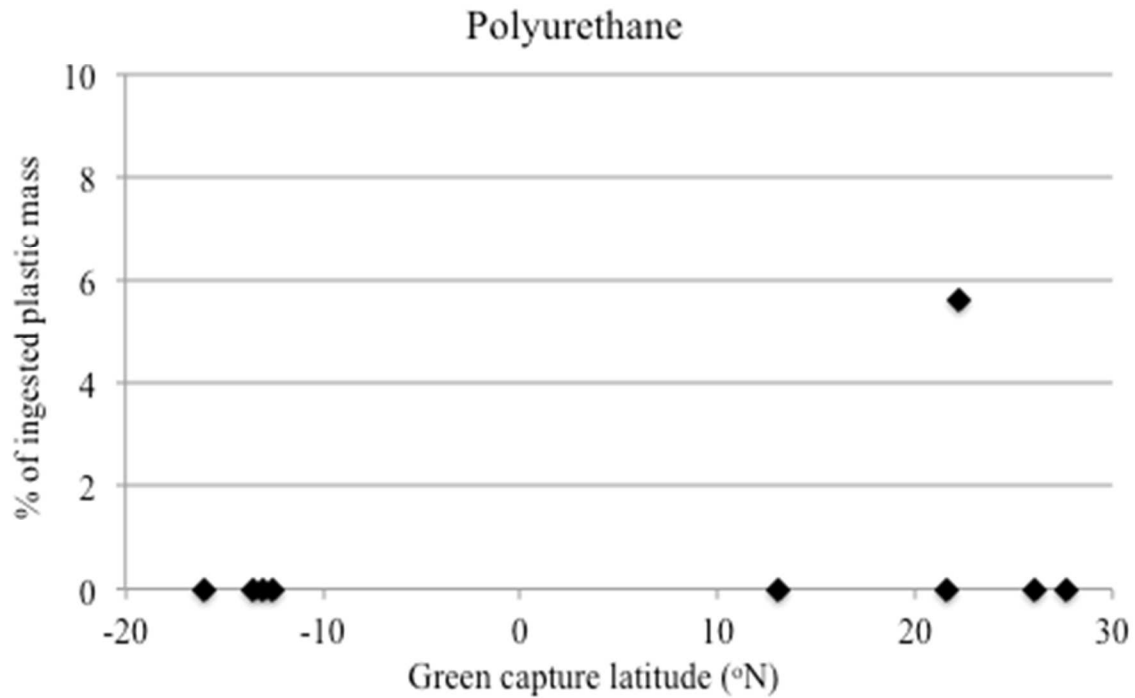

H.

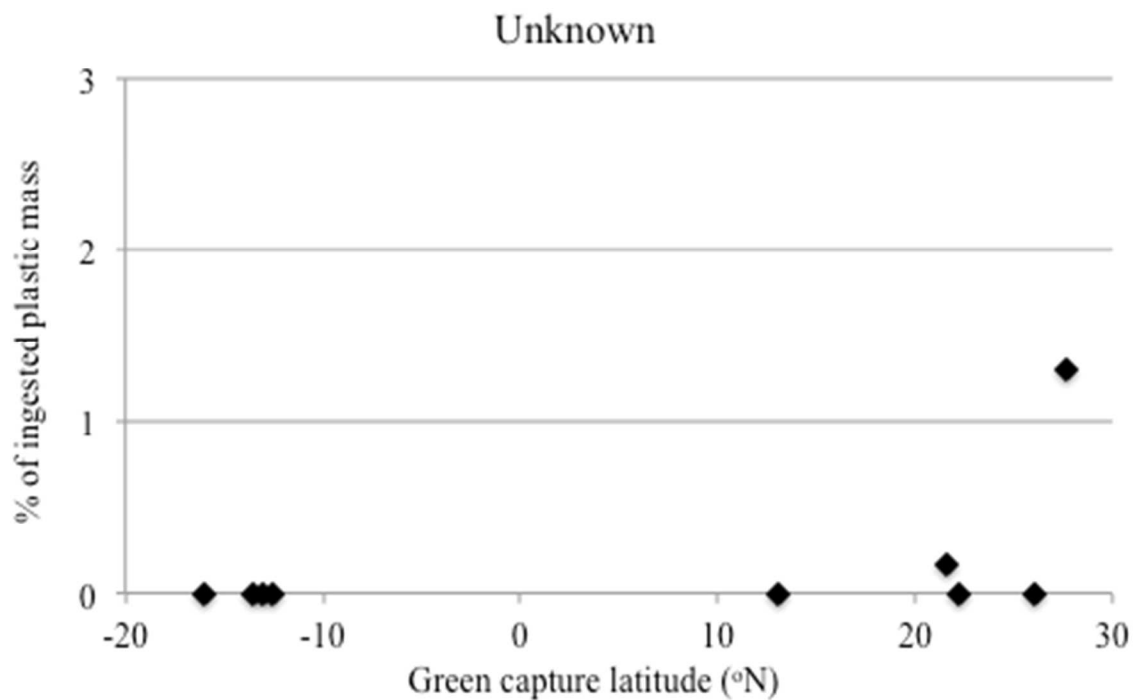

Figure S12. Percent of ingested plastic mass of a) high-density polyethylene (HDPE), b) low-density polyethylene, c) polypropylene (PP), d) polystyrene (PS), e) PE/PP mixture, f) unknown polyethylene (PE), g) polyurethane (PU), and h) unknown in green (n = 9) sea turtles with varying capture latitudes (°N).

A.

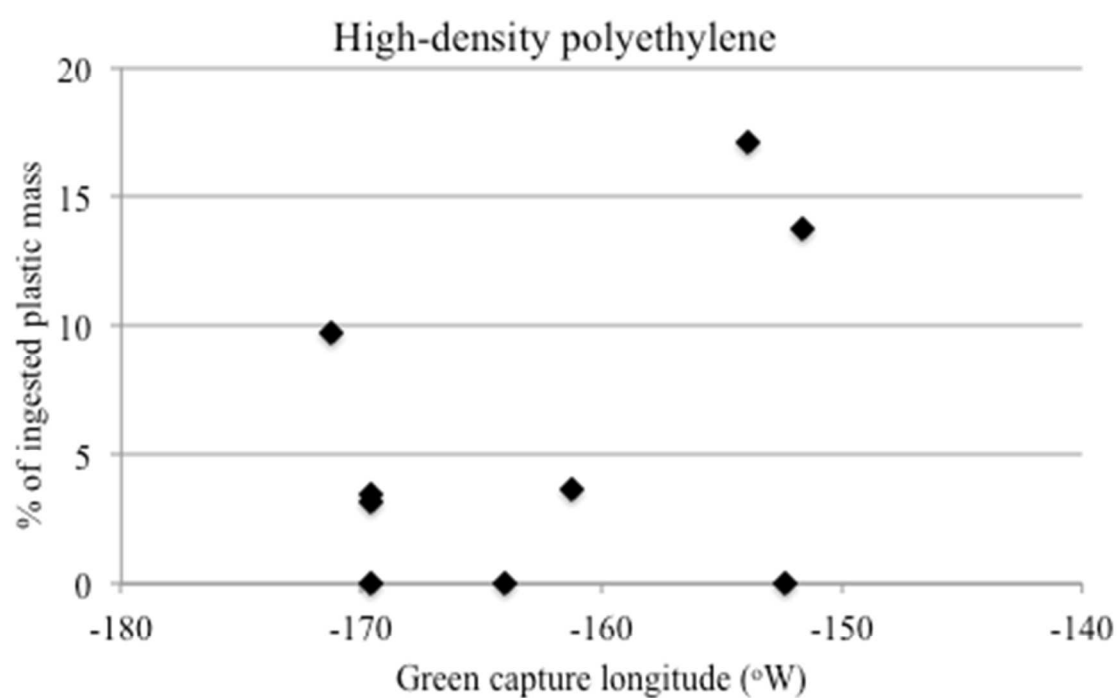

B.

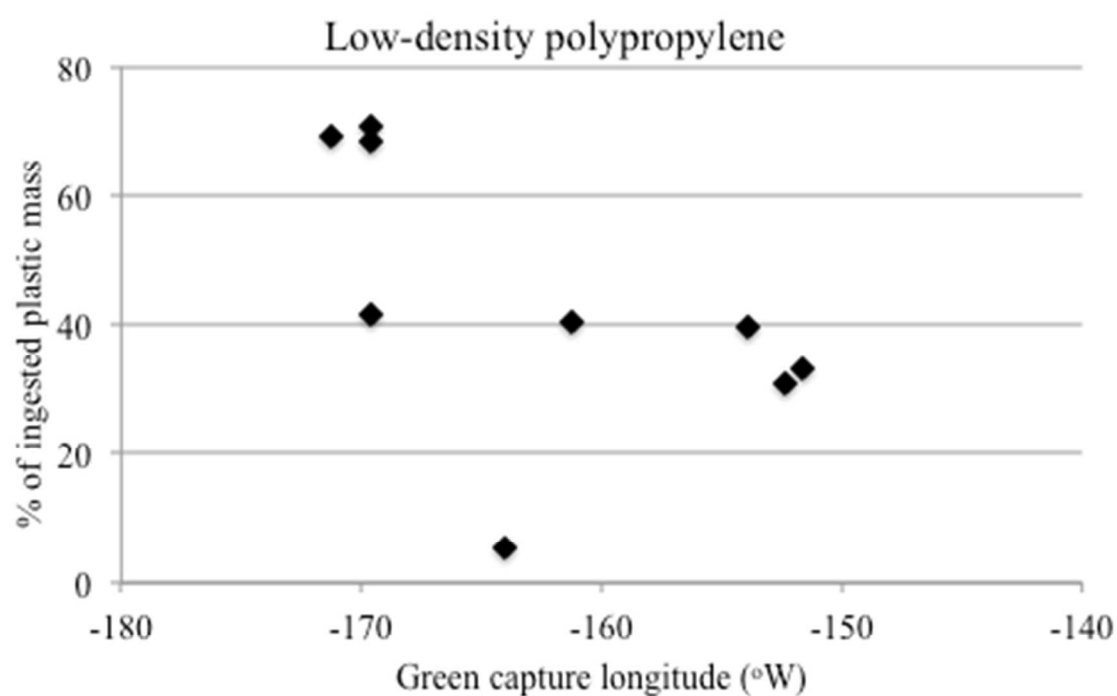

C.

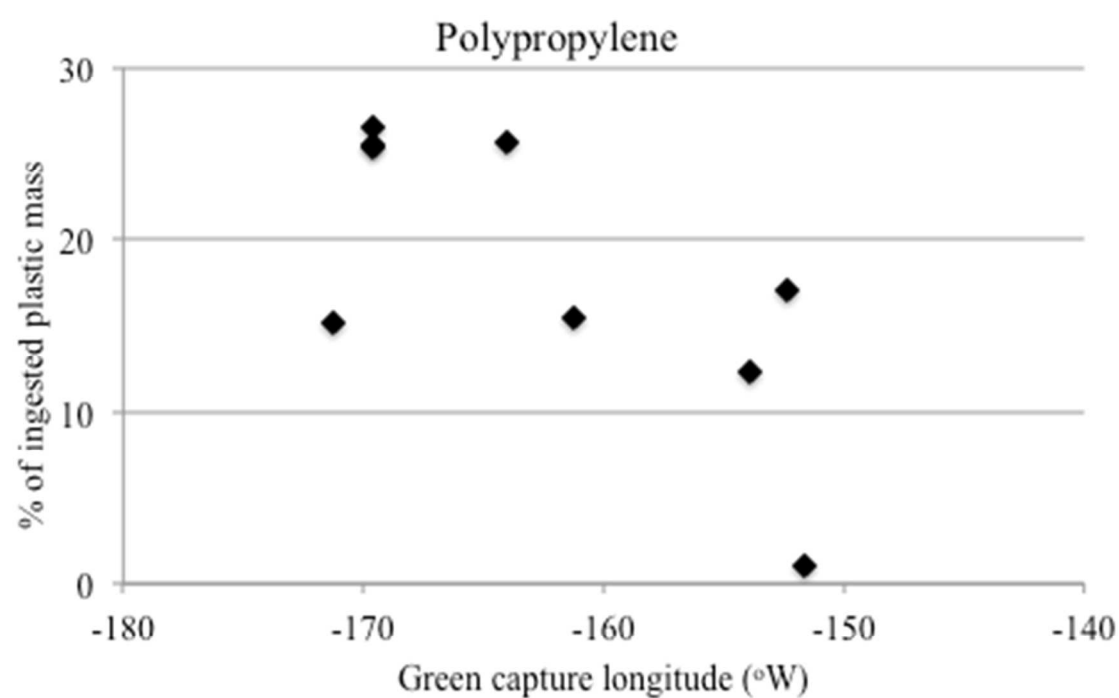

D.

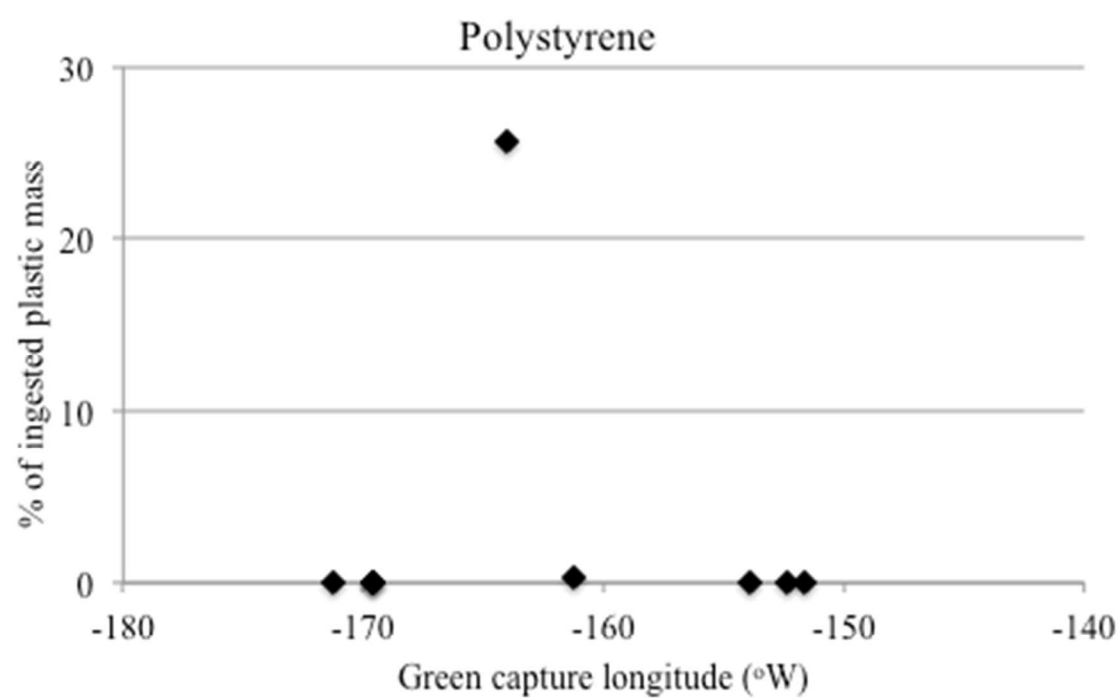

E.

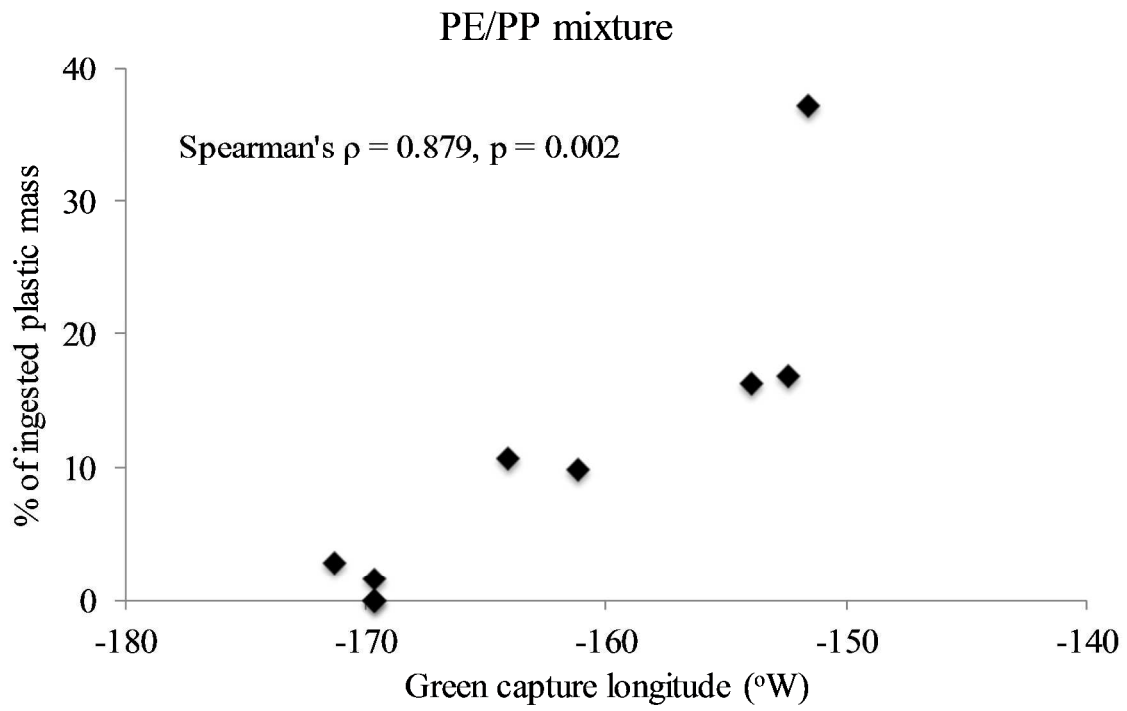

F.

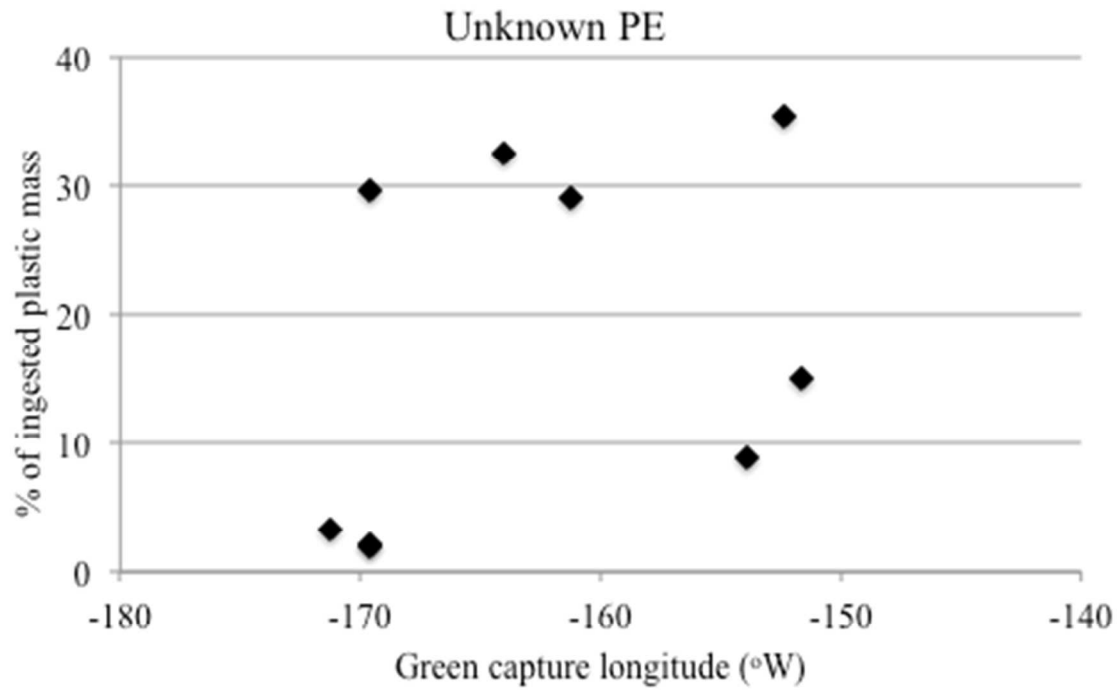

G.

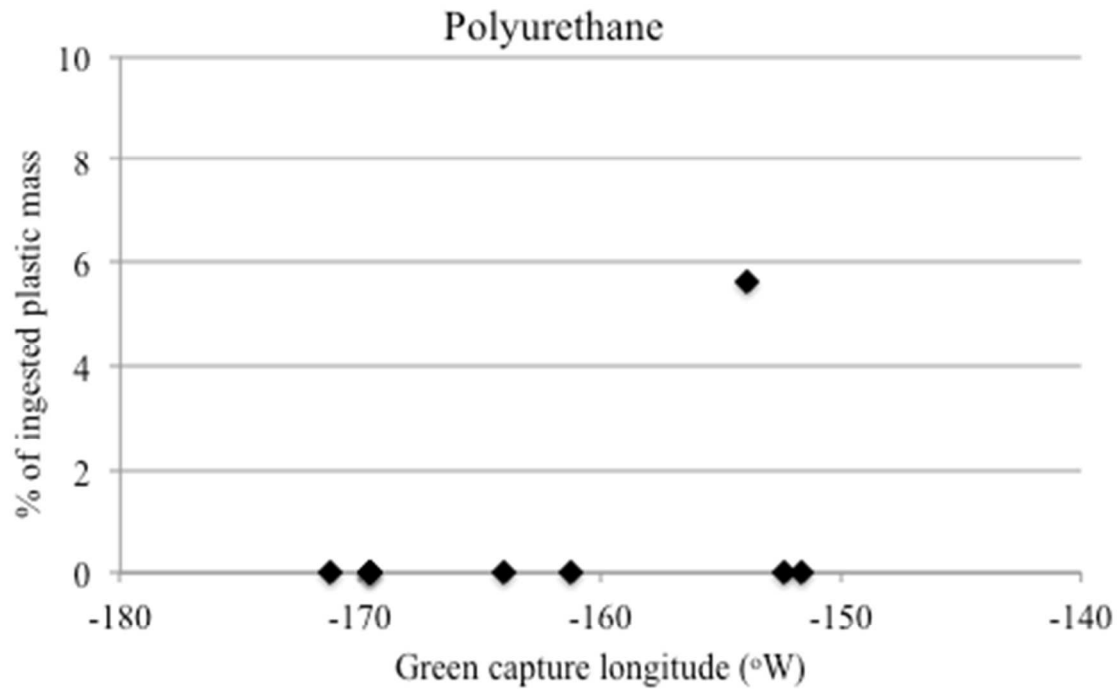

H.

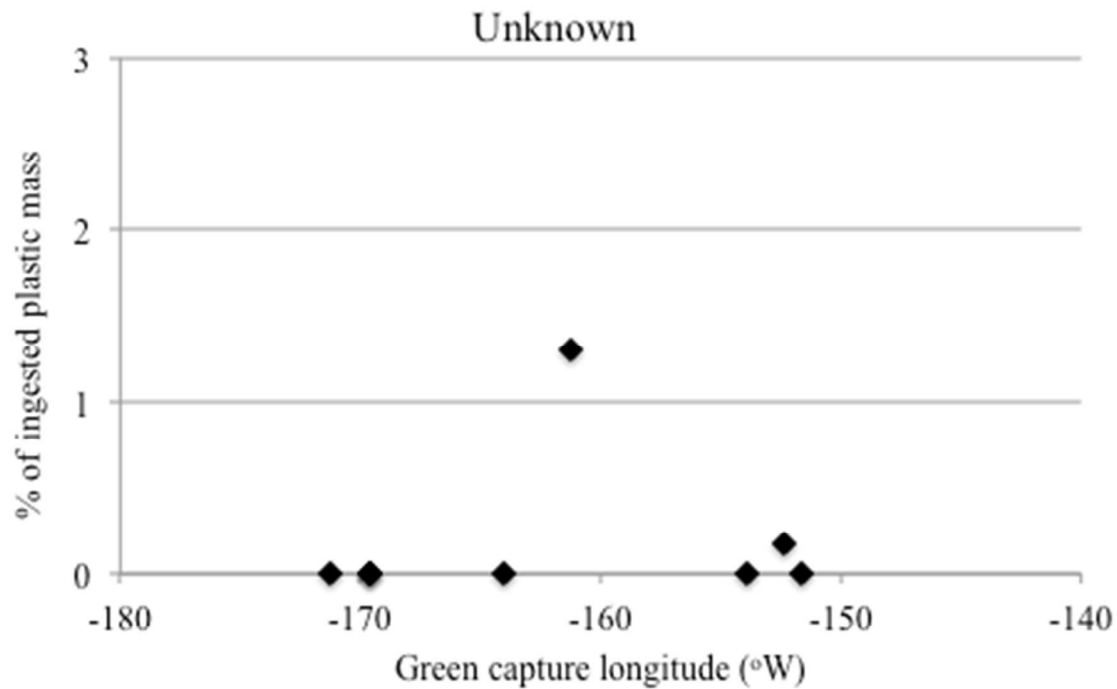

Figure S13. Percent of ingested plastic mass of a) high-density polyethylene (HDPE), b) low-density polyethylene, c) polypropylene (PP), d) polystyrene (PS), e) PE/PP mixture, f) unknown polyethylene (PE), g) polyurethane (PU), and h) unknown in green (n = 9) sea turtles with varying capture longitudes (°W).

## REFERENCES

1. Bigelow, K.; Musyl, M. K.; Poisson, F.; Kleiber, P., Pelagic longline gear depth and shoaling. *Fish Res* **2006**, 77, (2), 173-183.
2. Ito, R. Y.; Dollar, R. A.; Kawamoto, K. E., The Hawaii-based Longline Fishery for Swordfish, *Xiphias gladius*. In *Biology of Fisheries of Swordfish, Xiphias gladius*, Barrett, I.; Sosa-Nishizaki, O.; Bartoo, N., Eds. U.S. Department of Commerce: Seattle, Washington, 1998; pp 77-88.
3. Boggs, C. H.; Ito, R., Hawaii's pelagic fisheries. *Marine Fisheries Review* **1993**, 55, (2), 69-82.
4. Boggs, C. H., Depth, Capture Time, and Hooked Longevity of Longline-Caught Pelagic Fish - Timing Bites of Fish with Chips. *Fish B-Noaa* **1992**, 90, (4), 642-658.
